# Supplementary material for: GDF11 Regulates PC12 Neural Stem Cells via ALK5-Dependent PI3K-Akt Signaling Pathway
Source: MDPI journal article supplement (doi:10.3390/ijms232012279), 2022-10-14

# The uncropped blots of Figure 1D

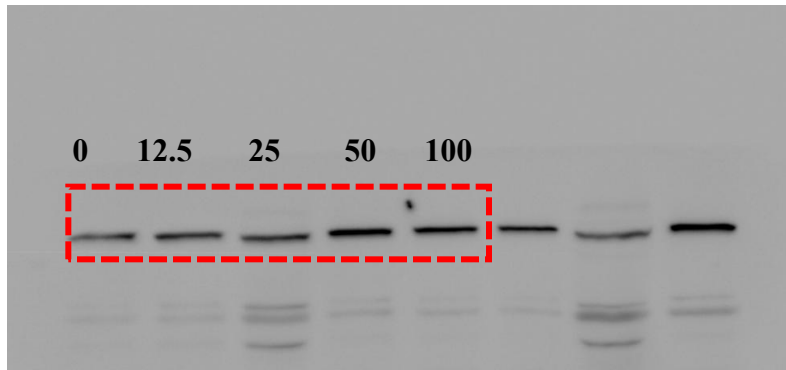

GFAP for Figure 1D

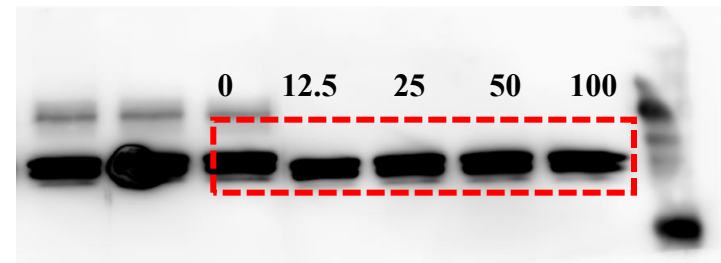

$\beta$ -actin for Figure 1D

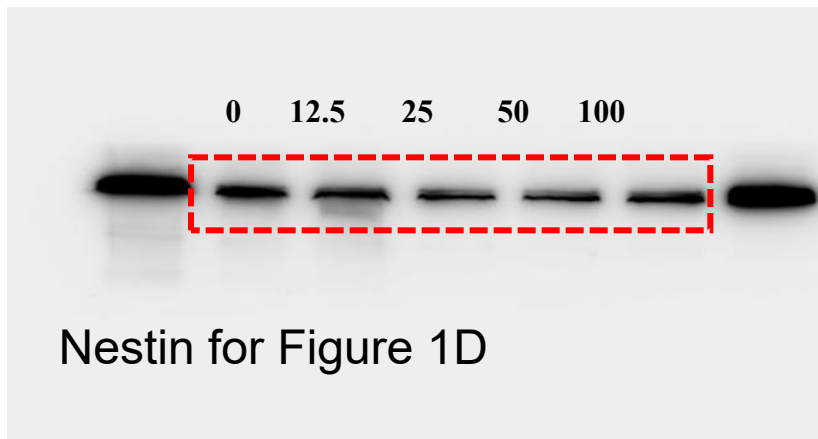

Nestin for Figure 1D

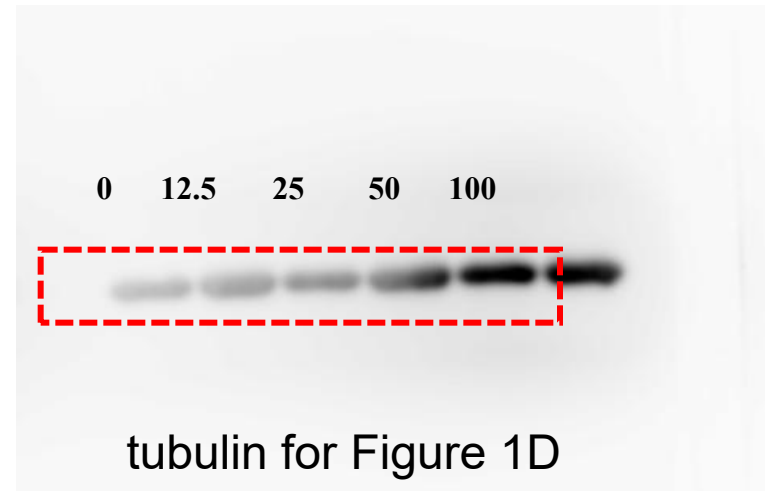

tubulin for Figure 1D

# The uncropped blots of Figure 7A

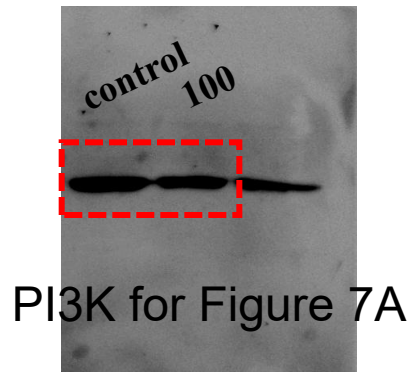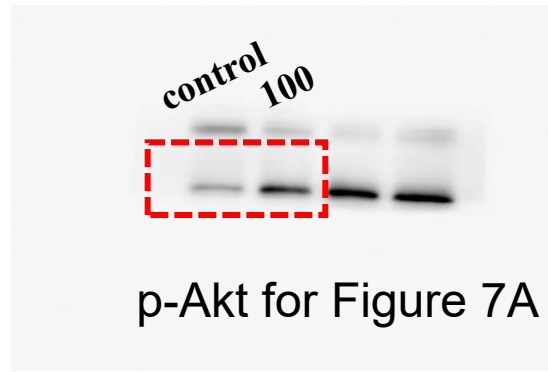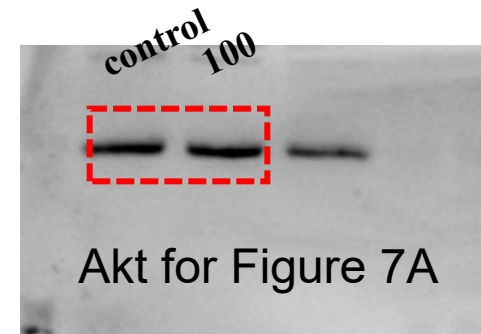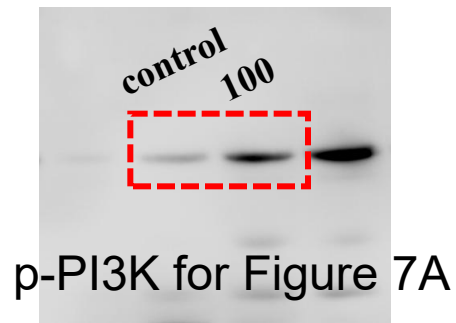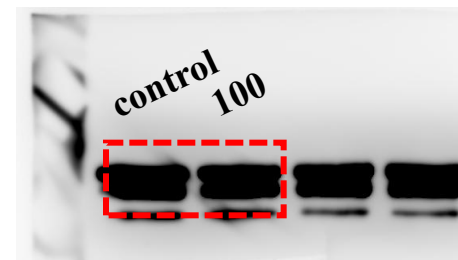

# The uncropped blots of Figure 7D

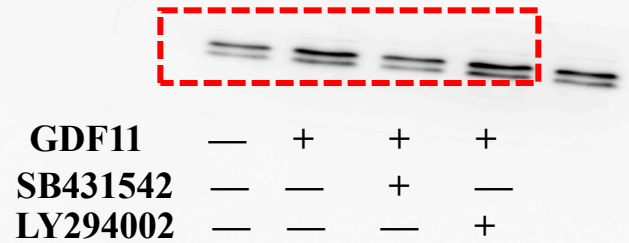

p-Smad2/3 for Figure 7D

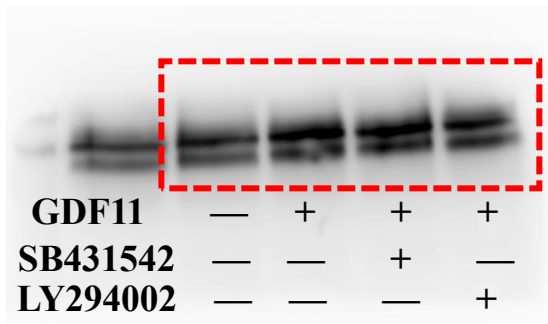

Smad2/3 for Figure 7D

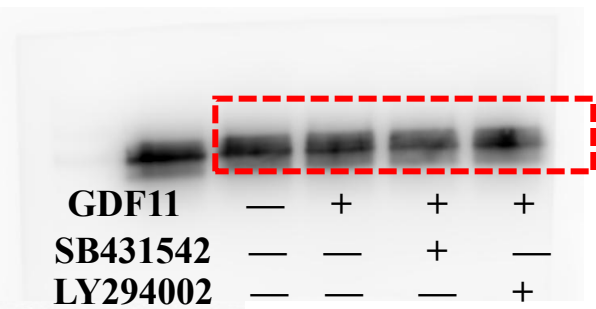

Akt for Figure 7D

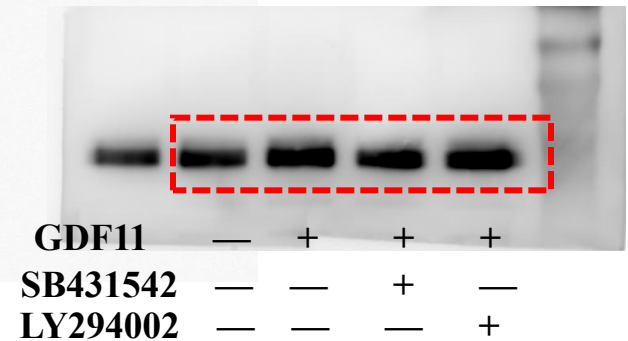

GAPDH for Figure 7D

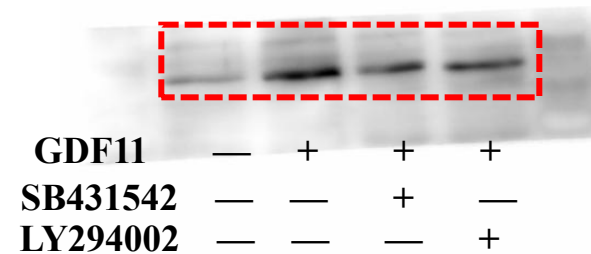

p-Akt for Figure 7D

# The uncropped blots of Figure 7F

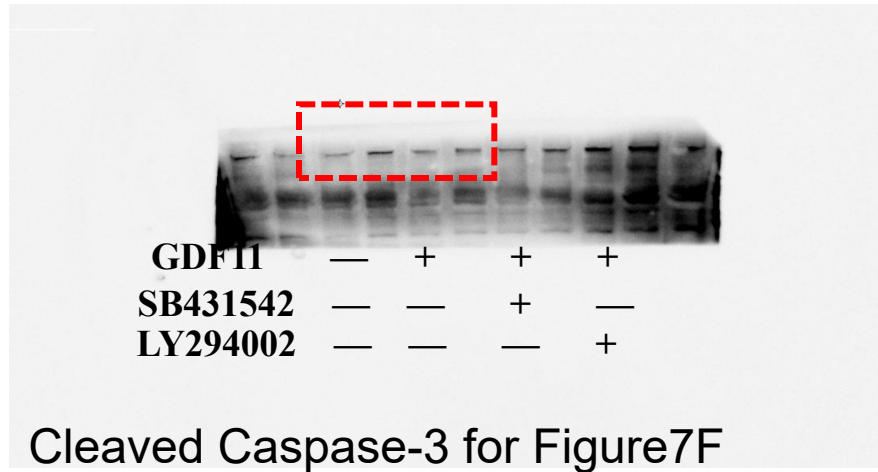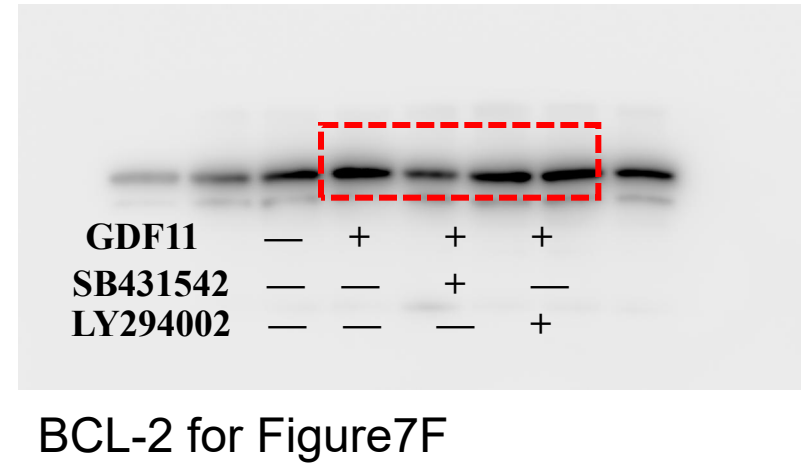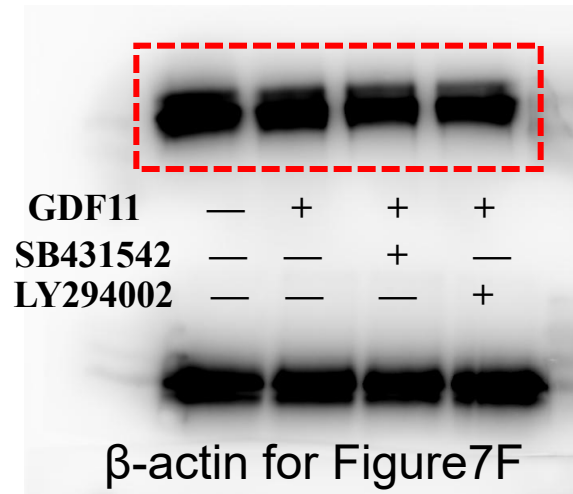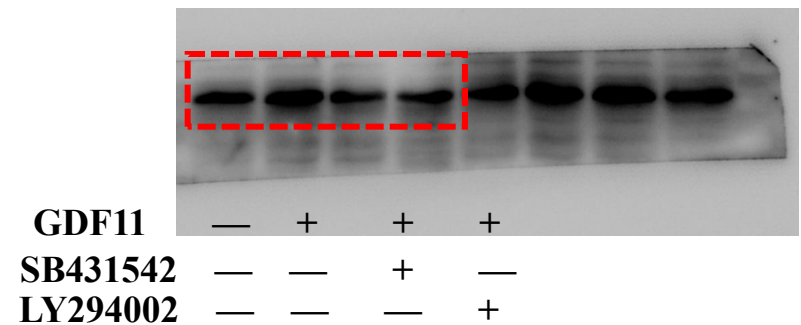

Supplement: s1 [file s1]
