# Supplementary material for: GDF11 Regulates PC12 Neural Stem Cells via ALK5-Dependent PI3K-Akt Signaling Pathway
Source: MDPI journal article supplement (doi:10.3390/ijms232012279), 2022-10-14

Table S1. Primer sequence for qRT-PCR

| primers                              | Forward (5'-3')         | Reverse(5'-3')           |
|--------------------------------------|-------------------------|--------------------------|
| <i>GAPDH</i>                         | GGCATTGCTCTCAATGACAA    | TGTGAGGGAGATGCTCAGTG     |
| <i>Nestin</i>                        | GGAGGGCAGAGAAGACAGTG    | TGACATCCTGGACCTTGACA     |
| <i><math>\beta</math>-actin</i>      | GGCTGTATTCCCCTCCATCG    | TAAAGACCTCTATGCCAACACAGT |
| <i>GFAP</i>                          | CACGAACGAGTCCCTAGAGC    | TCACATCACCACGTCCTTGT     |
| <i><math>\beta</math>III-tubulin</i> | GAATGACCTGGTGTCCGAGT    | CAGAGCCAAGTGGACTCACA     |
| <i>Cyclin D2</i>                     | CTGTGCGCTACCGACTTCAA    | GCAGAGCTTCGATTTGCTCC     |
| <i>Rasal2</i>                        | ATGGAGCTGTCTCCGTCGT     | GCCTTTTACATCGAACACCCG    |
| <i>Cyclin D1</i>                     | CCCTGACACCAATCTCCTCA    | TCTTCTTCAAGGGCTCCAGG     |
| <i>Cdkn1B</i>                        | TCAAACGTGAGAGTGTCTAACG  | CCGGGCCGAAGAGATTTCTG     |
| <i>Trp53bp2</i>                      | AGTAAAGGCTCTAAAGCTCACCC | GTAAGAGGTCGGCATTGGAAG    |
| <i>Ccnyl1</i>                        | GAGAGGCTCCTAACTTATGCTGA | CCTGGTCATCCCAAACCTTG     |
| <i>Cyclin B1</i>                     | AAGGTGCCTGTGTGTGAACC    | GTCAGCCCCATCATCTGCG      |
| <i>Cyclin A2</i>                     | GCCTTCACCATTCATGTGGAT   | TTGCTGCGGGTAAAGAGACAG    |

Figure S1

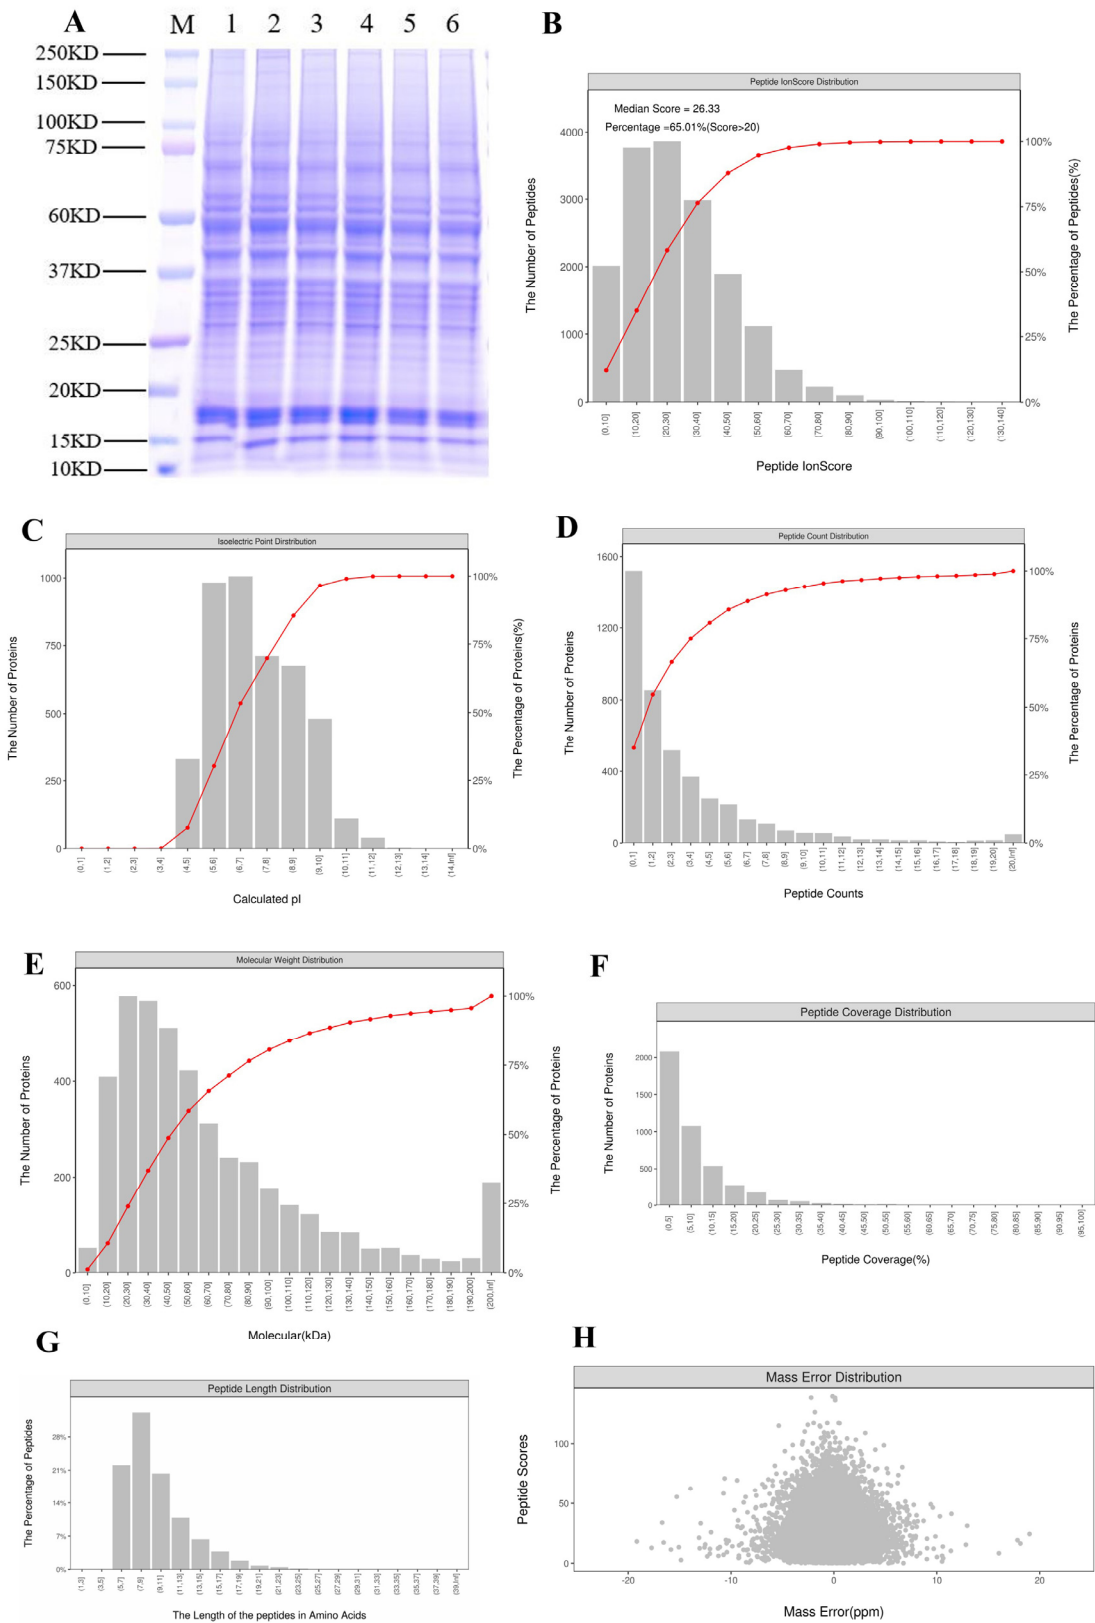

Figure S2

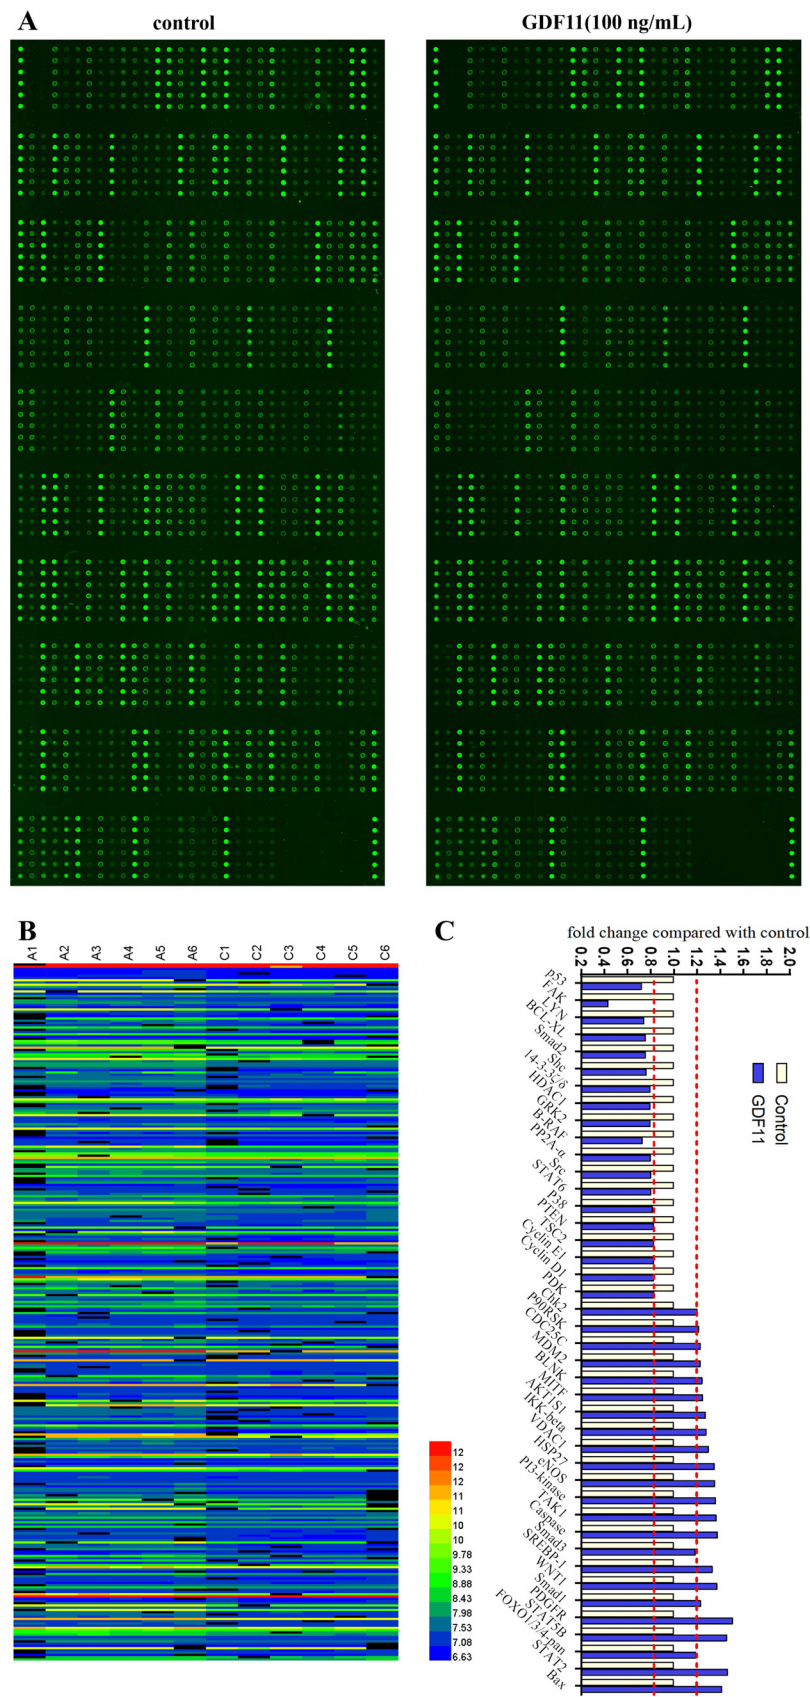

Figure S3

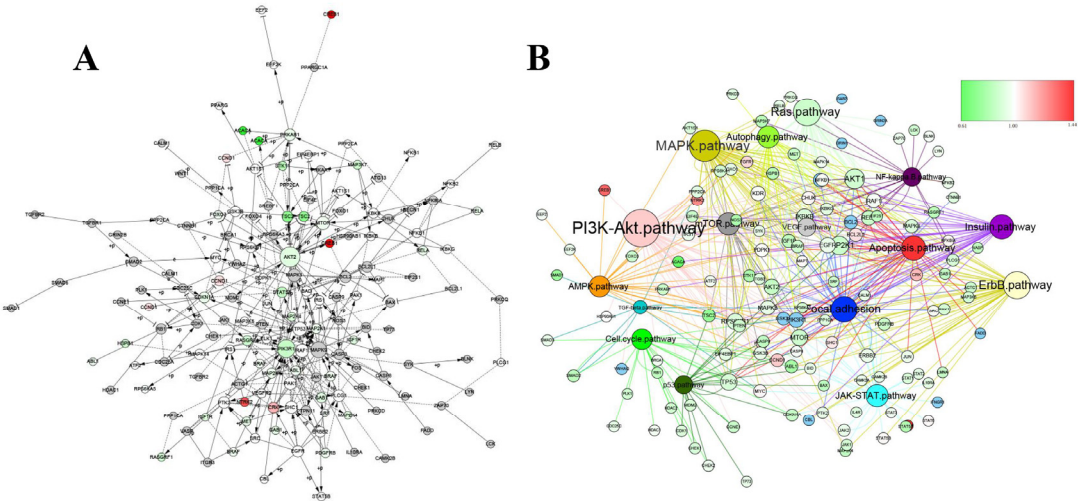

Supplement: s1 [file s1]
