# Supplementary material for: GDF11 Regulates PC12 Neural Stem Cells via ALK5-Dependent PI3K-Akt Signaling Pathway
Source: Int J Mol Sci. 2022 Oct 14;23(20):12279. doi: 10.3390/ijms232012279 (PMC9602726; doi:10.3390/ijms232012279)
Supplement: Supplementary file 1 [file ijms-23-12279-s001.zip]

Archive with 5 entries (5 files):
- File S1.pdf
- Table S1 and suppl. figures.pdf
- Table S2.xls
- Table S3.xls
- Table S4.xls
