# Supplementary material for: GDF11 Regulates PC12 Neural Stem Cells via ALK5-Dependent PI3K-Akt Signaling Pathway
Source: Int J Mol Sci. 2022 Oct 14;23(20):12279. doi: 10.3390/ijms232012279 (PMC9602726; doi:10.3390/ijms232012279)
Supplement: Supplementary file 1 [file ijms-23-12279-s001.zip › Table S2.xls]

Protein	Description	Gene	C1	C2	C3	A1	A2	A3
A0A0A0MQA5	Tubulin alpha chain (Fragment)	Tuba4a	0.135907875	0.714969373	1.423521391	-1.318642183	-0.125470591	-0.830285865
A0A0M3HEP2	Zinc finger E-box-binding homeobox 2	Zeb2	0.861717981	0.969648198	0.826831447	-1.297586114	-0.570276931	-0.790334581
A0A0R4IZY2	Cytochrome P450 2D26	Cyp2d26	-0.943181078	-0.810670888	-0.896412776	0.463988275	0.944009451	1.242267015
A0A0R4J073	BRCA1-A complex subunit RAP80	Uimc1	-0.869399753	-0.767971572	-1.074429576	1.014000609	0.972400492	0.7253998
A0A0R4J135	Selenium-binding protein 2	Selenbp2	-0.871699344	-0.899471934	-0.876916155	0.420797641	1.065540903	1.161748889
A0A0R4J1I3	Menin	Men1	0.958867572	0.532468592	1.036891628	-0.34669431	-1.42405702	-0.757476461
A0A0R4J243	Sin3 histone deacetylase corepressor complex component SDS3	Suds3	0.768215695	0.784070591	1.097997543	-1.270964555	-0.796588635	-0.582730638
A0A158SIT8	Proline, glutamic acid and leucine rich protein 1	Pelp1	1.038318623	1.154892569	0.446677556	-0.976097998	-0.671069972	-0.992720778
A0A1B0GSH8	Predicted gene 45808 (Fragment)	Gm45808	-0.953891679	-0.967862685	-0.594138265	0.177759838	1.036210877	1.301921913
A0A1D5RML8	DNA-directed RNA polymerase II subunit RPB3	Polr2c	-0.645369912	-0.276733071	-1.544636122	0.686574553	1.070551389	0.709613163
A0A1S6GWG9	Alpha-mannosidase	Man2c1	0.552456829	0.919616484	1.01947584	-1.450600434	-0.806601297	-0.234347423
A0A286YDJ5	ATP-dependent DNA helicase DDX11	Ddx11	0.404028558	1.41277854	0.691172736	-1.254954631	-0.586821526	-0.666203677
A2A4P4	Predicted gene, 27029	Gm27029	1.421658223	0.864175	0.202056465	-1.074088527	-0.568734692	-0.84506647
A2ADA5	tRNA pseudouridine synthase-like 1	Pusl1	1.206204177	0.308499389	1.015427279	-0.989925308	-0.414618319	-1.125587218
A2AI08	Taperin	Tprn	1.507501128	0.632146353	0.380227392	-0.751073238	-1.049957223	-0.718844412
A2AP31	MCG9810	Ndufb6	0.775270974	0.692081336	1.178662239	-0.520980276	-1.089236836	-1.035797439
A9C491	Cullin 7	Cul7	-0.429086449	-1.110434258	-0.972071042	0.50524884	1.433238973	0.573103937
B1AQZ0	Septin-8	Sept8	0.374544039	0.861042214	1.251758098	-1.338371579	-0.79822399	-0.350748782
B1AV75	RIKEN cDNA 2610301B20 gene	2610301B20Rik	0.49181781	0.983987792	1.110673915	-0.820784124	-0.48050454	-1.285190853
B1AY10	Transcriptional repressor NF-X1	Nfx1	0.674807472	1.027978291	0.86603655	-1.228568093	-0.263706172	-1.076548048
B1AZP2	Disks large-associated protein 4	Dlgap4	1.113408756	1.264406658	0.077994575	-1.086884069	-0.548049025	-0.820876895
B2RUR8	OTU domain-containing protein 7B	Otud7b	-1.004361742	-0.843143011	-0.608095143	1.591992719	0.391565815	0.472041361
B7ZMP1	Probable Xaa-Pro aminopeptidase 3	Xpnpep3	1.267626493	0.879247916	0.499122957	-0.763750627	-0.851176054	-1.031070684
D1FNM9	Calcium-transporting ATPase	Atp2b4	0.086432576	1.462323445	0.735911373	-0.509890038	-1.376095554	-0.398681802
D3YUJ3	Cyclin Y-like 1	Ccnyl1	-0.741754984	-0.802948167	-0.992425854	1.45983319	0.305443455	0.771852359
D3Z286	Transmembrane protein with metallophosphoesterase domain	Tmppe	0.602264672	1.344255518	0.62394081	-1.255561042	-0.653105347	-0.661794612
D6RH77	Phospholipase	Pld1	-0.137446153	-0.675968902	-1.483753024	1.370306192	0.551112252	0.375749635
E0CYA9	DNA polymerase epsilon subunit 4	Pole4	-0.686990503	-0.715320229	-1.041857599	0.047866397	1.367666588	1.028635346
E9PUE3	Endothelin-converting enzyme 2	Ece2	-1.123900082	-0.938056461	-0.309047281	1.192832496	1.156754254	0.021417074
E9PW37	RAS protein activator-like 2	Rasal2	0.704899158	1.388622723	0.227969368	-0.253005348	-1.433958731	-0.634527169
E9Q2E4	HECT domain E3 ubiquitin protein ligase 4	Hectd4	1.095116535	1.004360006	0.59557642	-0.884701217	-0.816050903	-0.994300841
E9Q4T4	Coiled-coil domain-containing 71-like	Ccdc71l	1.354945153	0.107932176	0.91038223	-0.281433778	-1.214147776	-0.877678005
E9Q8A3	Phosphatidylinositol 4-kinase beta	Pi4kb	0.927263163	0.437239941	1.120041529	-0.504129561	-0.500645132	-1.479769939
E9Q9G8	Intraflagellar transport protein 122 homolog	Ift122	-0.791077314	-1.304550285	-0.548973478	0.722249788	0.989560147	0.932791143
E9Q9M0	Centrosomal protein of 290 kDa	Cep290	0.997992254	0.848063346	0.888389052	-0.882773691	-0.894748092	-0.956922869
E9QAC6	Galectin	Pick1	0.731049241	1.381930044	0.37865317	-0.504302171	-1.296482437	-0.690847847
E9QJT2	H/ACA ribonucleoprotein complex non-core subunit NAF1	Naf1	-1.17781472	-0.615454985	-0.778641911	0.602745312	0.581114104	1.388052199
E9QJU8	Transformation-related protein 53-binding protein 2	Trp53bp2	-0.8661852	-1.039894191	-0.804876145	1.120668173	0.80267897	0.787608392
E9QJV4	Pre-mRNA-processing factor 39	Prpf39	-0.862339421	-0.932001281	-0.796645642	0.561642808	1.449723387	0.579620148
F6QC57	E3 ubiquitin-protein ligase UBR3	Ubr3	-0.776022848	-0.980674818	-0.884523677	0.645045667	1.348259747	0.647915929
F7BP55	Adenylate kinase 2, mitochondrial (Fragment)	Ak2	1.234610647	0.744018764	0.698218445	-0.793064115	-1.067176252	-0.816607489
G3UW83	Nuclear factor of kappa light polypeptide gene enhancer in B-cells inhibitor-like 2	Tonsl	-0.19629719	-0.947743958	-1.265560154	0.231800931	0.953867964	1.223932406
G3X940	Histone acetyltransferase	Kat6a	0.690965346	0.828951678	1.162090107	-0.69918881	-1.114501303	-0.868317018
G3X977	Inter-alpha trypsin inhibitor, heavy chain 2	Itih2	0.691585036	0.554251671	1.313721722	-0.970192336	-0.417631989	-1.171734104
G4V4Z1	Gag-pro-pol polyprotein	gag-pro-pol	-0.915300509	-1.194530172	-0.339585418	0.650972803	1.437292114	0.361151183
J3JS97	Arrestin, beta 2	Arrb2	-1.111703594	-0.858147087	-0.522238895	1.35332104	0.198513331	0.940255206
O08989	Ras-related protein M-Ras	Mras	0.098381901	1.086585304	1.169964966	-0.257301792	-1.344284768	-0.753345611
O35245	Polycystin-2	Pkd2	0.925357617	0.661722278	1.030089465	-0.77641066	-0.503400457	-1.337358242
O35495	Cyclin-dependent kinase 14	Cdk14	-0.920082435	-0.98423017	-0.784455794	1.165683498	0.920691073	0.602393828
O88839	Disintegrin and metalloproteinase domain-containing protein 15	Adam15	-0.637757792	-1.425331529	-0.268143979	1.294213005	0.146286432	0.890733863
O89001	Carboxypeptidase D	Cpd	1.558265589	0.584600737	0.35816705	-0.9302144	-0.748451817	-0.82236716
O89090	Transcription factor Sp1	Sp1	-0.775231752	-0.654323334	-1.009331029	0.310442149	1.607644653	0.520799312
P01887	Beta-2-microglobulin	B2m	-0.54913246	-0.886128893	-1.230181366	1.012978742	0.761276595	0.891187381
P20065	Thymosin beta-4	Tmsb4x	-0.914531494	-0.201712813	-1.381608955	1.050208773	0.545882601	0.901761888
P21460	Cystatin-C	Cst3	-0.872455527	-1.034375871	-0.736101553	0.460851972	1.22126947	0.960811508
P28667	MARCKS-related protein	Marcksl1	1.035855487	0.87590248	0.796191679	-0.728281876	-1.123886738	-0.855781033
P42337	Phosphatidylinositol 4,5-bisphosphate 3-kinase catalytic subunit alpha isoform	Pik3ca	0.931044203	0.943276392	0.856971502	-0.994603376	-0.944850753	-0.791837967
P46414	Cyclin-dependent kinase inhibitor 1B	Cdkn1b	1.328195974	0.660723228	0.478542431	-0.483704178	-1.421250862	-0.562506593
P46660	Alpha-internexin	Ina	0.014816215	1.264151762	1.149445069	-0.987040555	-0.537041958	-0.904330533
P49070	Calcium signal-modulating cyclophilin ligand	Camlg	-0.686698564	-1.215947114	-0.484827097	1.558638175	0.559372505	0.269462095
P49442	Inositol polyphosphate 1-phosphatase	Inpp1	-0.779987721	-0.961529071	-0.937357843	0.681433308	1.252889892	0.744551435
P56371	Ras-related protein Rab-4A	Rab4a	-0.531111753	-0.973902449	-1.020936362	1.392113532	0.837427275	0.296409756
P57759	Endoplasmic reticulum resident protein 29	Erp29	1.223066831	0.87309947	0.585453139	-0.859625413	-0.899540692	-0.922453335
P61458	Pterin-4-alpha-carbinolamine dehydratase	Pcbd1	-1.098189998	-0.963320172	-0.322751054	0.060236888	0.992230403	1.331793932
P63147	Ubiquitin-conjugating enzyme E2 B	Ube2b	0.238836682	0.647422555	1.530259887	-1.170776884	-0.489735139	-0.7560071
P70399	TP53-binding protein 1	Tp53bp1	0.920101896	1.026908361	0.751576816	-1.102822048	-0.648626806	-0.947138219
P83741	Serine/threonine-protein kinase WNK1	Wnk1	0.848956686	0.606758101	1.223983973	-0.792534188	-0.897893763	-0.98927081
P98156	Very low-density lipoprotein receptor	Vldlr	-0.914775302	-0.929274128	-0.876855297	0.997137732	1.021242447	0.702524547
Q03145	Ephrin type-A receptor 2	Epha2	0.999854643	1.332395378	0.208151894	-0.863788388	-0.715752288	-0.960861239
Q08639	Transcription factor Dp-1	Tfdp1	0.517119405	0.947751285	0.977909544	-0.968553795	-0.083936484	-1.390289955
Q2TBF9	Microtubule-associated protein 1 light chain 3 beta	Map1lc3b	0.584733552	1.286013054	0.445809797	0.050764794	-1.16330334	-1.204017857
Q3TAV1	Uncharacterized protein	Gpnmb	1.204082712	0.821036477	0.569828178	-0.598386313	-0.681906086	-1.314654968
Q3TEL5	Lipase	Lipa	-0.819931863	-1.036765114	-0.776322942	0.687173064	0.595573644	1.350273211
Q3TII3	Elongation factor 1-alpha	Eef1a1	0.236897941	1.331868728	0.987069417	-0.851800673	-0.947585197	-0.756450217
Q3TKN7	COMM domain containing 10, isoform CRA_c	Commd10	0.851995196	0.69489016	1.127196195	-0.99663306	-0.593299703	-1.084148789
Q3TPJ9	Caspase 6	Casp6	-0.487541539	-0.697900079	-1.369400472	0.791934583	0.550622036	1.212285472
Q3UCV8	Ubiquitin thioesterase otulin	Otulin	-0.974263943	-0.705471462	-0.987703567	1.258911515	0.723348383	0.685179073
Q3UDP0	WD repeat-containing protein 41	Wdr41	-1.474813654	-0.540920582	-0.219687858	0.02397213	1.243994143	0.96745582
Q3UGE1	Uncharacterized protein	Trappc12	0.190874442	0.907089641	1.395934935	-0.549719028	-0.96963435	-0.97454564
Q3UGF1	WD repeat-containing protein 19	Wdr19	-0.964253594	-0.876490761	-0.65285146	0.730117204	0.25413896	1.509339651
Q3UJ20	Uncharacterized protein	Eno2	0.699767908	1.04789981	0.969916609	-0.959817602	-0.930704566	-0.827062159
Q3UJF5	DNA topoisomerase	Top3b	-0.874501947	-1.075614427	-0.741435043	1.159744819	0.69396494	0.837841657
Q3UL64	Neuraminidase 1, isoform CRA_a	Neu1	-0.56206772	-0.625003728	-1.163215108	0.950858483	1.426711117	-0.027283043
Q3ULJ3	MCG3697, isoform CRA_c	Upf3a	-0.442069221	-0.997584356	-1.162109744	0.501325107	1.078976651	1.021461563
Q3UMG6	Non-metastatic cells 7, protein expressed in, isoform CRA_c	Nme7	0.790965336	0.742369435	1.102649391	-0.438029226	-1.093818848	-1.104136089
Q3UR91	Pumilio homolog 2	Pum2	0.989787605	1.189607388	0.453192906	-0.670005086	-1.093091423	-0.86949139
Q3UVK0	Endoplasmic reticulum metallopeptidase 1	Ermp1	0.812748789	1.133265939	0.699901675	-0.734631166	-0.640129717	-1.271155521
Q3UY05	Uncharacterized protein	Ndufs8	0.485159333	1.171762403	0.788452042	-0.565072131	-1.524472231	-0.355829417
Q3V100	Mannose-6-phosphate isomerase	Mpi	0.718810874	1.11719239	0.848569425	-0.987272865	-1.072257791	-0.625042033
Q4FK31	Mid1 interacting protein 1 (Gastrulation specific G12-like (Zebrafish)), isoform CRA_b	Mid1ip1	-0.206707	-1.093405852	-0.992809163	1.583863669	0.444138977	0.264919369
Q543N7	Protein kinase C and casein kinase substrate in neurons 3, isoform CRA_a	Pacsin3	-0.824452311	-0.592817065	-1.219463142	1.063997132	1.023978474	0.548756911
Q5NCI0	Up-regulator of cell proliferation	Urgcp	1.048609801	0.597590618	0.956823441	-0.451466669	-1.309627392	-0.841929798
Q5U4D9	THO complex subunit 6 homolog	Thoc6	-0.788569824	-0.824108033	-1.094242022	1.076437689	0.732525333	0.897956858
Q5XJV5	Nuclear receptor coactivator 6	Ncoa6	0.923745545	0.920781805	0.783461878	-1.329679703	-0.841756161	-0.456553365
Q5XJY5	Coatomer subunit delta	Arcn1	1.062197608	0.822399862	0.558454986	-0.058919755	-1.329919232	-1.054213469
Q60771	Claudin-11	Cldn11	0.206429724	1.32861059	0.990069591	-0.680443385	-1.076512358	-0.768154161
Q61187	Tumor susceptibility gene 101 protein	Tsg101	0.989573951	0.841339723	0.882976385	-1.120560363	-0.73248432	-0.860845376
Q61418	H(+)/Cl(-) exchange transporter 4	Clcn4	-0.715014042	-1.122774929	-0.759335878	0.516250271	1.372104711	0.708769866
Q63880	Carboxylesterase 3A	Ces3a	-0.803134587	-0.899060628	-0.867395721	0.275548295	0.938398693	1.355643948
Q64471	Glutathione S-transferase theta-1	Gstt1	-1.079381558	-0.784526041	-0.770510971	0.628342319	0.672294906	1.333781345
Q67FY2	B-cell CLL/lymphoma 9-like protein	Bcl9l	0.728296981	0.050682568	1.536466802	-0.542996881	-1.233103949	-0.539345521
Q68FL4	Putative adenosylhomocysteinase 3	Ahcyl2	-0.792981192	-0.757132474	-0.941051982	0.081555895	1.16880855	1.240801202
Q69ZC8	GPALPP motifs-containing protein 1	Gpalpp1	-0.581143983	-0.890264136	-1.02041999	1.356014497	0.983016964	0.152796648
Q6A0E5	MKIAA0024 protein (Fragment)	mKIAA0024	-0.951379077	-0.917202269	-0.85661611	0.813751335	0.831581379	1.079864743
Q6NZL1	DEAH (Asp-Glu-Ala-His) box polypeptide 37	Dhx37	0.809663493	0.818747864	1.090929573	-0.970926675	-0.794223322	-0.954190933
Q6PHZ5	Putative RNA-binding protein 15B	Rbm15b	0.488065329	0.249557894	1.593872524	-0.590516483	-1.254461867	-0.486517397
Q6QD59	Vesicle transport protein SEC20	Bnip1	-0.896631235	-0.737412131	-1.054280572	1.068843539	0.60119361	1.01828679
Q78YY6	DnaJ homolog subfamily C member 15	Dnajc15	-0.869539431	-0.946022878	-0.761187882	1.437793364	0.40565867	0.733298157
Q7TMQ1	Gap junction protein	Gja1	0.642345057	0.596084017	1.307645574	-0.364204015	-1.023055158	-1.158815475
Q80UY2	E3 ubiquitin-protein ligase KCMF1	Kcmf1	-0.72312307	-0.752228019	-0.986187032	1.367548818	0.062182778	1.031806524
Q8BFW4	Tripartite motif-containing protein 65	Trim65	-0.716825162	-1.274267692	-0.598579777	0.469348769	0.926126706	1.194197155
Q8BGD8	Cytochrome c oxidase assembly factor 6 homolog	Coa6	0.83343854	1.186401889	0.475269243	-0.931078087	-0.242596614	-1.321434971
Q8BGS2	BolA-like protein 2	Bola2	0.216007706	0.894096544	1.331362686	-0.514351429	-0.6030297	-1.324085808
Q8BGX2	Mitochondrial import inner membrane translocase subunit Tim29	Timm29	-0.848455562	-1.037093828	-0.776924944	1.264009917	0.811870459	0.586593957
Q8BIA4	F-box/WD repeat-containing protein 8	Fbxw8	-0.864131848	-0.812373709	-0.990651742	0.762209038	1.281531632	0.623416628
Q8BN21	Serine/threonine-protein kinase VRK2	Vrk2	1.128971858	0.99359548	0.157244805	0.048267541	-1.18809578	-1.139983904
Q8BNW9	Kelch repeat and BTB domain-containing protein 11	Kbtbd11	1.397131896	0.812592327	0.348023761	-1.089288939	-0.764719389	-0.703739656
Q8BV13	COP9 signalosome complex subunit 7b	Cops7b	0.767625654	1.382784763	0.287172918	-0.793341889	-1.288507124	-0.355734322
Q8BVE8	Histone-lysine N-methyltransferase NSD2	Nsd2	1.049547338	1.256576123	0.136320365	-0.358268632	-1.024282318	-1.059892876
Q8BWH0	Putative sodium-coupled neutral amino acid transporter 7	Slc38a7	1.269790987	0.972053771	0.364271304	-0.728197131	-1.029755715	-0.848163216
Q8BWQ1	UDP-glucuronosyltransferase 2A3	Ugt2a3	-0.943342546	-0.779260748	-0.793062021	0.216539413	0.846222479	1.452903424
Q8BZ03	Serine/threonine-protein kinase D2	Prkd2	1.007352778	0.960837976	0.750085724	-0.893976301	-1.046636109	-0.777664067
Q8C1D8	Protein IWS1 homolog	Iws1	-0.8757293	-0.811885936	-1.030808281	0.909789304	0.749271515	1.059362698
Q8C5W3	Tubulin-specific chaperone cofactor E-like protein	Tbcel	0.941516998	1.122476458	0.46416499	-1.330055628	-0.323942295	-0.874160524
Q8C6B2	Rhotekin	Rtkn	0.989126306	0.187680187	1.335074272	-0.595212961	-0.878035142	-1.038632662
Q8CD17	Uncharacterized protein	Ap4m1	-0.825053033	-0.888185788	-0.989553875	1.146320428	0.664563043	0.891909225
Q8CG70	Prolyl 3-hydroxylase 3	P3h3	-0.701092992	-0.169238077	-1.413546617	0.697398163	1.400236555	0.186242969
Q8CIG9	F-box/LRR-repeat protein 8	Fbxl8	1.126563048	0.559593648	0.864647836	-0.374278837	-0.804204693	-1.372321002
Q8JZL3	Thiamine-triphosphatase	Thtpa	0.136481571	0.863827163	1.304446319	-1.474935384	-0.498157914	-0.331661754
Q8K119	PMS1 homolog 1, mismatch repair system component	Pms1	0.725415657	0.594403863	1.323156967	-0.75701754	-1.038414483	-0.847544464
Q8K1N2	Pleckstrin homology-like domain family B member 2	Phldb2	1.096089903	0.671353859	0.927744152	-0.873298159	-1.091043317	-0.730846438
Q8QZS1	3-hydroxyisobutyryl-CoA hydrolase, mitochondrial	Hibch	-0.952190323	-0.655300284	-1.06450776	0.614668477	0.893354411	1.163975479
Q8QZS3	Folliculin	Flcn	0.450376069	1.095705496	1.054338225	-1.246816379	-0.592274815	-0.761328596
Q8R191	Synaptogyrin-3	Syngr3	0.473176872	0.934720696	1.169304596	-0.563240086	-1.315093528	-0.69886855
Q8R1V4	Transmembrane emp24 domain-containing protein 4	Tmed4	0.968710627	0.542417871	1.167282893	-0.918156845	-0.800839205	-0.959415342
Q8R404	MICOS complex subunit MIC13	Mic13	-0.599168593	-0.994022178	-1.027182511	1.306389954	0.77506408	0.538919248
Q8VCS3	Glycosaminoglycan xylosylkinase	Fam20b	-1.13540248	-0.553430349	-0.876748199	0.312472151	1.126554439	1.126554439
Q8VDK1	Deaminated glutathione amidase	Nit1	-0.911124934	-0.940755203	-0.618663207	1.547837483	0.260613162	0.662092701
Q8VE10	N-alpha-acetyltransferase 40	Naa40	0.633017035	0.586366533	1.304599501	-1.007460303	-0.317474045	-1.19904872
Q8VE18	Protein SMG8	Smg8	-0.974660056	-0.870706133	-0.799515897	0.894524433	1.275574267	0.474783386
Q8VE98	CD276 antigen	Cd276	-0.74234343	-0.841594725	-0.908621573	0.080698479	1.206880187	1.204981061
Q91WS0	CDGSH iron-sulfur domain-containing protein 1	Cisd1	-0.782610387	-0.969833156	-0.937932684	1.180540143	0.625015427	0.884820659
Q91YN8	General transcription factor II H, polypeptide 2, isoform CRA_a	Gtf2h2	0.153024994	1.532573924	0.703294511	-0.572943521	-1.18732781	-0.628622098
Q921G6	Leucine-rich repeat and calponin homology domain-containing protein 4	Lrch4	-1.232099001	-1.118915355	-0.163142347	0.704651052	1.091376241	0.71812941
Q924H2	Mediator of RNA polymerase II transcription subunit 15	Med15	-0.825245022	-0.988108999	-0.868785645	0.566325739	1.177831175	0.937982753
Q99L43	Phosphatidate cytidylyltransferase 2	Cds2	-0.527234051	-0.960484824	-0.936144893	1.603499227	0.322383821	0.49798072
Q99LM9	Transcriptional adapter 1	Tada1	-1.167012424	-1.163549993	0.043684115	0.225105231	1.261319441	0.800453631
Q99M08	Uncharacterized protein C4orf3 homolog		1.41666973	0.023481985	0.793568093	-0.154862414	-1.337706045	-0.74115135
Q99PU8	Putative ATP-dependent RNA helicase DHX30	Dhx30	1.001613336	0.951671801	0.766187503	-0.907408045	-0.766623172	-1.045441423
Q9CPS7	RNA-binding protein PNO1	Pno1	0.084906577	1.464247464	0.728953838	-0.500420999	-0.395441961	-1.382244919
Q9CPV3	39S ribosomal protein L42, mitochondrial	Mrpl42	-0.730413837	-0.811942813	-1.096579062	0.839705896	0.524755667	1.274474148
Q9CQ25	Mitotic-spindle organizing protein 2	Mzt2	-0.80134791	-0.964765693	-0.804440991	1.222903646	1.107627566	0.240023382
Q9CQX5	Claudin domain-containing protein 1	Cldnd1	0.909883819	0.735662239	1.066339383	-0.76440436	-0.892569369	-1.054911713
Q9CQZ1	Heat shock factor-binding protein 1	Hsbp1	0.417858917	0.665490214	1.312363807	-1.444656281	-0.721426465	-0.229630191
Q9CTN4	Rho-related BTB domain-containing protein 3	Rhobtb3	-0.354833186	-1.231563133	-0.876132073	1.384733041	0.325085556	0.752709795
Q9CWG9	Biogenesis of lysosome-related organelles complex 1 subunit 2	Bloc1s2	-0.836607454	-0.643186058	-1.091572022	1.426285876	0.522664631	0.622415028
Q9CXA2	Trans-L-3-hydroxyproline dehydratase	L3hypdh	-0.357521666	-0.844887848	-1.178155815	0.292132984	1.546299408	0.542132936
Q9CY28	GTP-binding protein 8	Gtpbp8	0.851787819	0.693800286	1.117341331	-1.072650953	-0.540606206	-1.049672276
Q9D219	B-cell CLL/lymphoma 9 protein	Bcl9	-0.690230274	-0.983061135	-0.827895778	1.533942007	0.643312687	0.323932493
Q9D3W4	GPN-loop GTPase 3	Gpn3	0.892642599	0.811204856	0.806269235	-0.818531426	-1.476007573	-0.215577691
Q9D8X5	CCR4-NOT transcription complex subunit 8	Cnot8	0.612934493	0.563847732	1.339418562	-0.34068547	-0.965600137	-1.20991518
Q9EPK2	Protein XRP2	Rp2	1.295207123	0.834992339	0.516571247	-0.98617764	-0.770927184	-0.889665886
Q9ER41	Torsin-1B	Tor1b	0.756721763	0.554280755	1.329848671	-0.92775849	-0.965101441	-0.747991259
Q9JI78	Peptide-N(4)-(N-acetyl-beta-glucosaminyl)asparagine amidase	Ngly1	-0.622735392	-0.930087289	-1.079179496	1.125177739	0.452393122	1.054431316
Q9Z2Y3	Homer protein homolog 1	Homer1	0.578974999	0.233023308	1.598748974	-0.818236912	-0.554456172	-1.038054197
