# Supplementary material for: GDF11 Regulates PC12 Neural Stem Cells via ALK5-Dependent PI3K-Akt Signaling Pathway
Source: Int J Mol Sci. 2022 Oct 14;23(20):12279. doi: 10.3390/ijms232012279 (PMC9602726; doi:10.3390/ijms232012279)
Supplement: Supplementary file 1 [file ijms-23-12279-s001.zip › Table S3.xls]

GO_ID	GO_Term	GO_Class	Pvalue	AdjustedPv	x1	n	x2	N	Up	Up_Prot_names	Down	Down_Prot_names
GO:0003712	transcription cofactor activity	MF	0.001103809	0.261781082	5	124	42	6530	4	G3X940 Q08639 Q5XJV5 Q9CQZ1	1	Q924H2
GO:0046854	phosphatidylinositol phosphorylation	BP	0.001663158	0.261781082	3	124	13	6530	2	E9Q8A3 P42337	1	P49442
GO:0003713	transcription coactivator activity	MF	0.006923556	0.472315658	3	124	21	6530	3	G3X940 Q08639 Q5XJV5	0
GO:0048015	phosphatidylinositol-mediated signaling	BP	0.007057356	0.472315658	2	124	7	6530	2	E9Q8A3 P42337	0
GO:0006650	glycerophospholipid metabolic process	BP	0.008631399	0.472315658	4	124	43	6530	2	E9Q8A3 P42337	2	P49442 Q6A0E5
GO:0000123	histone acetyltransferase complex	CC	0.017587981	0.472315658	2	124	11	6530	1	G3X940	1	Q99LM9
GO:0007605	sensory perception of sound	BP	0.01898928	0.472315658	1	124	1	6530	1	A2AI08	0
GO:0031467	Cul7-RING ubiquitin ligase complex	CC	0.01898928	0.472315658	1	124	1	6530	0		1	A9C491
GO:1990393	3M complex	CC	0.01898928	0.472315658	1	124	1	6530	0		1	A9C491
GO:0043966	histone H3 acetylation	BP	0.01898928	0.472315658	1	124	1	6530	1	G3X940	0
GO:0042612	MHC class I protein complex	CC	0.01898928	0.472315658	1	124	1	6530	0		1	P01887
GO:0030229	very-low-density lipoprotein particle receptor activity	MF	0.01898928	0.472315658	1	124	1	6530	0		1	P98156
GO:1990108	protein linear deubiquitination	BP	0.01898928	0.472315658	1	124	1	6530	0		1	Q3UCV8
GO:0004308	exo-alpha-sialidase activity	MF	0.01898928	0.472315658	1	124	1	6530	0		1	Q3UL64
GO:0004476	mannose-6-phosphate isomerase activity	MF	0.01898928	0.472315658	1	124	1	6530	1	Q3V100	0
GO:0005922	connexin complex	CC	0.01898928	0.472315658	1	124	1	6530	1	Q7TMQ1	0
GO:0042721	mitochondrial inner membrane protein insertion complex	CC	0.01898928	0.472315658	1	124	1	6530	0		1	Q8BGX2
GO:0003860	3-hydroxyisobutyryl-CoA hydrolase activity	MF	0.01898928	0.472315658	1	124	1	6530	0		1	Q8QZS1
GO:0070461	SAGA-type complex	CC	0.01898928	0.472315658	1	124	1	6530	0		1	Q99LM9
GO:0006516	glycoprotein catabolic process	BP	0.01898928	0.472315658	1	124	1	6530	0		1	Q9JI78
GO:0001522	pseudouridine synthesis	BP	0.024333938	0.472315658	2	124	13	6530	1	A2ADA5	1	E9QJT2
GO:0016836	hydro-lyase activity	MF	0.024333938	0.472315658	2	124	13	6530	1	Q3UJ20	1	P61458
GO:1901136	carbohydrate derivative catabolic process	BP	0.024333938	0.472315658	2	124	13	6530	0		2	Q68FL4 Q9JI78
GO:0008430	selenium binding	MF	0.037620821	0.472315658	1	124	2	6530	0		1	A0A0R4J135
GO:0071391	cellular response to estrogen stimulus	BP	0.037620821	0.472315658	1	124	2	6530	1	A0A158SIT8	0
GO:0016486	peptide hormone processing	BP	0.037620821	0.472315658	1	124	2	6530	0		1	E9PUE3
GO:0070776	MOZ/MORF histone acetyltransferase complex	CC	0.037620821	0.472315658	1	124	2	6530	1	G3X940	0
GO:0015074	DNA integration	BP	0.037620821	0.472315658	1	124	2	6530	0		1	G4V4Z1
GO:0019068	virion assembly	BP	0.037620821	0.472315658	1	124	2	6530	0		1	G4V4Z1
GO:0004869	cysteine-type endopeptidase inhibitor activity	MF	0.037620821	0.472315658	1	124	2	6530	0		1	P21460
GO:0007050	cell cycle arrest	BP	0.037620821	0.472315658	1	124	2	6530	1	P46414	0
GO:0005788	endoplasmic reticulum lumen	CC	0.037620821	0.472315658	1	124	2	6530	1	P57759	0
GO:0006729	tetrahydrobiopterin biosynthetic process	BP	0.037620821	0.472315658	1	124	2	6530	0		1	P61458
GO:0008124	4-alpha-hydroxytetrahydrobiopterin dehydratase activity	MF	0.037620821	0.472315658	1	124	2	6530	0		1	P61458
GO:0097320	membrane tubulation	BP	0.037620821	0.472315658	1	124	2	6530	0		1	Q543N7
GO:0006659	phosphatidylserine biosynthetic process	BP	0.037620821	0.472315658	1	124	2	6530	0		1	Q6A0E5
GO:0004697	protein kinase C activity	MF	0.037620821	0.472315658	1	124	2	6530	1	Q8BZ03	0
GO:0005911	cell-cell junction	CC	0.040391052	0.472315658	2	124	17	6530	2	Q60771 Q7TMQ1	0
GO:0004857	enzyme inhibitor activity	MF	0.044858791	0.472315658	3	124	42	6530	2	G3X977 P46414	1	P21460
GO:0010256	endomembrane system organization	BP	0.044886492	0.472315658	2	124	18	6530	1	Q9ER41	1	Q543N7
GO:0004386	helicase activity	MF	0.047575845	0.472315658	3	124	43	6530	3	A0A286YDJ5 Q6NZL1 Q99PU8	0
GO:1901135	carbohydrate derivative metabolic process	BP	0.055675743	0.472315658	6	124	144	6530	4	G3X977 Q3UJ20 Q3UMG6 Q3V100	2	Q68FL4 Q9JI78
GO:0004813	alanine-tRNA ligase activity	MF	0.055901308	0.472315658	1	124	3	6530	1	A2A4P4	0
GO:0006419	alanyl-tRNA aminoacylation	BP	0.055901308	0.472315658	1	124	3	6530	1	A2A4P4	0
GO:0030212	hyaluronan metabolic process	BP	0.055901308	0.472315658	1	124	3	6530	1	G3X977	0
GO:0004861	cyclin-dependent protein serine/threonine kinase inhibitor activity	MF	0.055901308	0.472315658	1	124	3	6530	1	P46414	0
GO:0000015	phosphopyruvate hydratase complex	CC	0.055901308	0.472315658	1	124	3	6530	1	Q3UJ20	0
GO:0004634	phosphopyruvate hydratase activity	MF	0.055901308	0.472315658	1	124	3	6530	1	Q3UJ20	0
GO:0003917	DNA topoisomerase type I activity	MF	0.055901308	0.472315658	1	124	3	6530	0		1	Q3UJF5
GO:0009298	GDP-mannose biosynthetic process	BP	0.055901308	0.472315658	1	124	3	6530	1	Q3V100	0
GO:0004013	adenosylhomocysteinase activity	MF	0.055901308	0.472315658	1	124	3	6530	0		1	Q68FL4
GO:0019510	S-adenosylhomocysteine catabolic process	BP	0.055901308	0.472315658	1	124	3	6530	0		1	Q68FL4
GO:0007029	endoplasmic reticulum organization	BP	0.055901308	0.472315658	1	124	3	6530	1	Q9ER41	0
GO:0008237	metallopeptidase activity	MF	0.056199771	0.472315658	3	124	46	6530	1	O89001	2	E9PUE3 O88839
GO:0019205	nucleobase-containing compound kinase activity	MF	0.059391997	0.472315658	2	124	21	6530	2	F7BP55 Q3UMG6	0
GO:0004540	ribonuclease activity	MF	0.059391997	0.472315658	2	124	21	6530	1	Q9D8X5	1	G4V4Z1
GO:0048513	animal organ development	BP	0.064540498	0.472315658	2	124	22	6530	2	G3X940 Q7TMQ1	0
GO:0008080	N-acetyltransferase activity	MF	0.064540498	0.472315658	2	124	22	6530	2	G3X940 Q8VE10	0
GO:0005525	GTP binding	MF	0.067388179	0.472315658	8	124	216	6530	6	A0A0A0MQA5 B1AQZ0 O08989 Q3TII3 Q5NCI0 Q9CY28	2	P56371 Q9CTN4
GO:0006165	nucleoside diphosphate phosphorylation	BP	0.069833055	0.472315658	2	124	23	6530	2	Q3UJ20 Q3UMG6	0
GO:0034655	nucleobase-containing compound catabolic process	BP	0.069833055	0.472315658	2	124	23	6530	1	Q9D8X5	1	Q68FL4
GO:0019637	organophosphate metabolic process	BP	0.070441342	0.472315658	6	124	153	6530	4	E9Q8A3 P42337 Q3UJ20 Q3UMG6	2	P49442 Q6A0E5
GO:0019902	phosphatase binding	MF	0.073837303	0.472315658	1	124	4	6530	1	A2AI08	0
GO:0004523	RNA-DNA hybrid ribonuclease activity	MF	0.073837303	0.472315658	1	124	4	6530	0		1	G4V4Z1
GO:0019028	viral capsid	CC	0.073837303	0.472315658	1	124	4	6530	0		1	G4V4Z1
GO:0004181	metallocarboxypeptidase activity	MF	0.073837303	0.472315658	1	124	4	6530	1	O89001	0
GO:0005883	neurofilament	CC	0.073837303	0.472315658	1	124	4	6530	1	P46660	0
GO:0017137	Rab GTPase binding	MF	0.073837303	0.472315658	1	124	4	6530	0		1	Q9CTN4
GO:0000289	nuclear-transcribed mRNA poly(A) tail shortening	BP	0.073837303	0.472315658	1	124	4	6530	1	Q9D8X5	0
GO:0004535	poly(A)-specific ribonuclease activity	MF	0.073837303	0.472315658	1	124	4	6530	1	Q9D8X5	0
GO:0004553	hydrolase activity, hydrolyzing O-glycosyl compounds	MF	0.075262442	0.472315658	2	124	24	6530	1	A0A1S6GWG9	1	Q3UL64
GO:0008238	exopeptidase activity	MF	0.075262442	0.472315658	2	124	24	6530	2	B7ZMP1 O89001	0
GO:0016853	isomerase activity	MF	0.078952188	0.472315658	3	124	53	6530	2	A2ADA5 Q3V100	1	Q3UJF5
GO:0071103	DNA conformation change	BP	0.080821651	0.472315658	2	124	25	6530	1	G3X940	1	Q3UJF5
GO:0046128	purine ribonucleoside metabolic process	BP	0.089756394	0.472315658	3	124	56	6530	2	Q3UJ20 Q3UMG6	1	Q68FL4
GO:0006013	mannose metabolic process	BP	0.091435245	0.472315658	1	124	5	6530	1	A0A1S6GWG9	0
GO:0003785	actin monomer binding	MF	0.091435245	0.472315658	1	124	5	6530	0		1	P20065
GO:0009306	protein secretion	BP	0.091435245	0.472315658	1	124	5	6530	1	P57759	0
GO:0006265	DNA topological change	BP	0.091435245	0.472315658	1	124	5	6530	0		1	Q3UJF5
GO:0030126	COPI vesicle coat	CC	0.091435245	0.472315658	1	124	5	6530	1	Q5XJY5	0
GO:0005247	voltage-gated chloride channel activity	MF	0.091435245	0.472315658	1	124	5	6530	0		1	Q61418
GO:0007507	heart development	BP	0.091435245	0.472315658	1	124	5	6530	1	Q7TMQ1	0
GO:0008180	COP9 signalosome	CC	0.091435245	0.472315658	1	124	5	6530	1	Q8BV13	0
GO:0044451	nucleoplasm part	CC	0.097285132	0.472315658	3	124	58	6530	1	G3X940	2	Q924H2 Q99LM9
GO:0046914	transition metal ion binding	MF	0.102047355	0.472315658	15	124	509	6530	8	A0A1S6GWG9 B1AY10 B7ZMP1 G3X940 O89001 Q3V100 Q8BVE8 Q91YN8	7	A0A0R4IZY2 B2RUR8 F6QC57 G4V4Z1 Q80UY2 Q8BFW4 Q8CG70
GO:0098796	membrane protein complex	CC	0.103183322	0.472315658	5	124	131	6530	2	Q5XJY5 Q7TMQ1	3	P01887 Q8BGX2 Q8CD17
GO:0004866	endopeptidase inhibitor activity	MF	0.104223899	0.472315658	2	124	29	6530	1	G3X977	1	P21460
GO:1990234	transferase complex	CC	0.105062127	0.472315658	3	124	60	6530	1	G3X940	2	A9C491 Q99LM9
GO:0005388	calcium-transporting ATPase activity	MF	0.108701457	0.472315658	1	124	6	6530	1	D1FNM9	0
GO:0004402	histone acetyltransferase activity	MF	0.108701457	0.472315658	1	124	6	6530	1	G3X940	0
GO:0008134	transcription factor binding	MF	0.108701457	0.472315658	1	124	6	6530	1	Q08639	0
GO:0004550	nucleoside diphosphate kinase activity	MF	0.108701457	0.472315658	1	124	6	6530	1	Q3UMG6	0
GO:0006183	GTP biosynthetic process	BP	0.108701457	0.472315658	1	124	6	6530	1	Q3UMG6	0
GO:0006228	UTP biosynthetic process	BP	0.108701457	0.472315658	1	124	6	6530	1	Q3UMG6	0
GO:0006241	CTP biosynthetic process	BP	0.108701457	0.472315658	1	124	6	6530	1	Q3UMG6	0
GO:0003714	transcription corepressor activity	MF	0.108701457	0.472315658	1	124	6	6530	1	Q9CQZ1	0
GO:0070011	peptidase activity, acting on L-amino acid peptides	MF	0.110008461	0.472315658	7	124	203	6530	2	B7ZMP1 O89001	5	E9PUE3 G4V4Z1 O88839 Q3TPJ9 Q3UCV8
GO:0046483	heterocycle metabolic process	BP	0.110567463	0.472315658	17	124	601	6530	10	A0A286YDJ5 A2A4P4 A2ADA5 F7BP55 Q3UJ20 Q3UMG6 Q3V100 Q8K119 Q91YN8 Q9D8X5	7	E9QJT2 E9QJV4 G4V4Z1 P61458 Q3UJF5 Q68FL4 Q924H2
GO:0006725	cellular aromatic compound metabolic process	BP	0.112172207	0.474621111	17	124	602	6530	10	A0A286YDJ5 A2A4P4 A2ADA5 F7BP55 Q3UJ20 Q3UMG6 Q3V100 Q8K119 Q91YN8 Q9D8X5	7	E9QJT2 E9QJV4 G4V4Z1 P61458 Q3UJF5 Q68FL4 Q924H2
GO:0004222	metalloendopeptidase activity	MF	0.116536904	0.478334118	2	124	31	6530	0		2	E9PUE3 O88839
GO:0019899	enzyme binding	MF	0.117168974	0.478334118	3	124	63	6530	1	A2AI08	2	A9C491 Q9CTN4
GO:0005813	centrosome	CC	0.12564214	0.478334118	1	124	7	6530	1	E9Q9M0	0
GO:0005923	bicellular tight junction	CC	0.12564214	0.478334118	1	124	7	6530	1	Q60771	0
GO:0006298	mismatch repair	BP	0.12564214	0.478334118	1	124	7	6530	1	Q8K119	0
GO:0030983	mismatched DNA binding	MF	0.12564214	0.478334118	1	124	7	6530	1	Q8K119	0
GO:0070013	intracellular organelle lumen	CC	0.128388941	0.478334118	4	124	102	6530	2	G3X940 P57759	2	Q924H2 Q99LM9
GO:0044265	cellular macromolecule catabolic process	BP	0.129771666	0.478334118	3	124	66	6530	1	Q9D8X5	2	A9C491 Q9JI78
GO:0048856	anatomical structure development	BP	0.135107683	0.478334118	4	124	104	6530	4	E9Q9M0 G3X940 P46660 Q7TMQ1	0
GO:1901360	organic cyclic compound metabolic process	BP	0.139992833	0.478334118	17	124	618	6530	10	A0A286YDJ5 A2A4P4 A2ADA5 F7BP55 Q3UJ20 Q3UMG6 Q3V100 Q8K119 Q91YN8 Q9D8X5	7	E9QJT2 E9QJV4 G4V4Z1 P61458 Q3UJF5 Q68FL4 Q924H2
GO:0044248	cellular catabolic process	BP	0.141967917	0.478334118	4	124	106	6530	1	Q9D8X5	3	A9C491 Q68FL4 Q9JI78
GO:0006139	nucleobase-containing compound metabolic process	BP	0.142710355	0.478334118	16	124	575	6530	10	A0A286YDJ5 A2A4P4 A2ADA5 F7BP55 Q3UJ20 Q3UMG6 Q3V100 Q8K119 Q91YN8 Q9D8X5	6	E9QJT2 E9QJV4 G4V4Z1 Q3UJF5 Q68FL4 Q924H2
GO:0048731	system development	BP	0.142831662	0.478334118	3	124	69	6530	3	G3X940 P46660 Q7TMQ1	0
GO:0060271	cilium morphogenesis	BP	0.158571164	0.495220263	1	124	9	6530	1	E9Q9M0	0
GO:0044767	single-organism developmental process	BP	0.163347554	0.508120651	4	124	112	6530	4	E9Q9M0 G3X940 P46660 Q7TMQ1	0
GO:0004175	endopeptidase activity	MF	0.167020591	0.511065662	4	124	113	6530	0		4	E9PUE3 G4V4Z1 O88839 Q3TPJ9
GO:0042623	ATPase activity, coupled	MF	0.168832286	0.511065662	2	124	39	6530	2	A0A286YDJ5 D1FNM9	0
GO:0030117	membrane coat	CC	0.168832286	0.511065662	2	124	39	6530	1	Q5XJY5	1	Q8CD17
GO:0016310	phosphorylation	BP	0.171344417	0.511065662	10	124	327	6530	8	E9Q8A3 P42337 P83741 Q03145 Q3UJ20 Q3UMG6 Q8BN21 Q8BZ03	2	O35495 P49442
GO:0016787	hydrolase activity	MF	0.174075576	0.511065662	20	124	772	6530	11	A0A0A0MQA5 A0A1S6GWG9 A0A286YDJ5 B7ZMP1 D1FNM9 D3Z286 O89001 Q3TII3 Q6NZL1 Q99PU8 Q9D8X5	9	E9PUE3 G4V4Z1 O88839 Q3TPJ9 Q3UCV8 Q3UL64 Q68FL4 Q8QZS1 Q9CTN4
GO:0004559	alpha-mannosidase activity	MF	0.174571344	0.511065662	1	124	10	6530	1	A0A1S6GWG9	0
GO:0009982	pseudouridine synthase activity	MF	0.174571344	0.511065662	1	124	10	6530	1	A2ADA5	0
GO:0030145	manganese ion binding	MF	0.174571344	0.511065662	1	124	10	6530	1	B7ZMP1	0
GO:0098797	plasma membrane protein complex	CC	0.189352632	0.511065662	2	124	42	6530	1	Q7TMQ1	1	P01887
GO:0031625	ubiquitin protein ligase binding	MF	0.190269681	0.511065662	1	124	11	6530	0		1	A9C491
GO:0004177	aminopeptidase activity	MF	0.190269681	0.511065662	1	124	11	6530	1	B7ZMP1	0
GO:0070588	calcium ion transmembrane transport	BP	0.190269681	0.511065662	1	124	11	6530	1	D1FNM9	0
GO:0004190	aspartic-type endopeptidase activity	MF	0.190269681	0.511065662	1	124	11	6530	0		1	G4V4Z1
GO:0006821	chloride transport	BP	0.190269681	0.511065662	1	124	11	6530	0		1	Q61418
GO:1901575	organic substance catabolic process	BP	0.199550142	0.528966419	5	124	144	6530	2	Q3UJ20 Q9D8X5	3	A9C491 Q68FL4 Q9JI78
GO:0008270	zinc ion binding	MF	0.201486813	0.528966419	12	124	423	6530	7	A0A1S6GWG9 B1AY10 G3X940 O89001 Q3V100 Q8BVE8 Q91YN8	5	B2RUR8 F6QC57 G4V4Z1 Q80UY2 Q8BFW4
GO:0016887	ATPase activity	MF	0.208689804	0.533614706	3	124	83	6530	2	A0A286YDJ5 D1FNM9	1	Q9CTN4
GO:0009205	purine ribonucleoside triphosphate metabolic process	BP	0.210191307	0.533614706	2	124	45	6530	2	Q3UJ20 Q3UMG6	0
GO:0019904	protein domain specific binding	MF	0.220783313	0.537463042	1	124	13	6530	1	E9QAC6	0
GO:0004129	cytochrome-c oxidase activity	MF	0.220783313	0.537463042	1	124	13	6530	1	Q8BGD8	0
GO:0006508	proteolysis	BP	0.226184067	0.537463042	7	124	241	6530	1	O89001	6	A9C491 E9PUE3 G4V4Z1 O88839 Q3TPJ9 Q3UCV8
GO:0006334	nucleosome assembly	BP	0.235609593	0.537463042	1	124	14	6530	1	G3X940	0
GO:0018024	histone-lysine N-methyltransferase activity	MF	0.235609593	0.537463042	1	124	14	6530	1	Q8BVE8	0
GO:0031418	L-ascorbic acid binding	MF	0.235609593	0.537463042	1	124	14	6530	0		1	Q8CG70
GO:0017111	nucleoside-triphosphatase activity	MF	0.240334433	0.54351494	7	124	249	6530	6	A0A0A0MQA5 A0A286YDJ5 D1FNM9 Q3TII3 Q6NZL1 Q99PU8	1	Q9CTN4
GO:0006807	nitrogen compound metabolic process	BP	0.249401069	0.546868819	21	124	854	6530	11	A0A286YDJ5 A2A4P4 A2ADA5 F7BP55 G3X977 Q3UJ20 Q3UMG6 Q3V100 Q8K119 Q91YN8 Q9D8X5	10	E9PUE3 E9QJT2 E9QJV4 G4V4Z1 P61458 Q3UJF5 Q68FL4 Q6A0E5 Q8VDK1 Q924H2
GO:0004003	ATP-dependent DNA helicase activity	MF	0.250156003	0.546868819	1	124	15	6530	1	A0A286YDJ5	0
GO:0004867	serine-type endopeptidase inhibitor activity	MF	0.250156003	0.546868819	1	124	15	6530	1	G3X977	0
GO:0005516	calmodulin binding	MF	0.250156003	0.546868819	1	124	15	6530	1	P28667	0
GO:0004843	thiol-dependent ubiquitin-specific protease activity	MF	0.250156003	0.546868819	1	124	15	6530	0		1	Q3UCV8
GO:0016592	mediator complex	CC	0.250156003	0.546868819	1	124	15	6530	0		1	Q924H2
GO:0006732	coenzyme metabolic process	BP	0.25243877	0.549523642	2	124	51	6530	1	Q3UJ20	1	P61458
GO:0004197	cysteine-type endopeptidase activity	MF	0.264427785	0.549523642	1	124	16	6530	0		1	Q3TPJ9
GO:0030131	clathrin adaptor complex	CC	0.264427785	0.549523642	1	124	16	6530	0		1	Q8CD17
GO:0001104	RNA polymerase II transcription cofactor activity	MF	0.264427785	0.549523642	1	124	16	6530	0		1	Q924H2
GO:0044723	single-organism carbohydrate metabolic process	BP	0.266597835	0.552138148	2	124	53	6530	2	A0A1S6GWG9 Q3UJ20	0
GO:0005200	structural constituent of cytoskeleton	MF	0.278430081	0.563301988	1	124	17	6530	1	A0A0A0MQA5	0
GO:0006096	glycolytic process	BP	0.278430081	0.563301988	1	124	17	6530	1	Q3UJ20	0
GO:0030246	carbohydrate binding	MF	0.292167939	0.571980517	1	124	18	6530	1	E9QAC6	0
GO:0032501	multicellular organismal process	BP	0.299929489	0.57962325	4	124	124	6530	4	A2AI08 G3X940 P46660 Q7TMQ1	0
GO:0009150	purine ribonucleotide metabolic process	BP	0.309002798	0.584579812	2	124	59	6530	2	Q3UJ20 Q3UMG6	0
GO:0005506	iron ion binding	MF	0.323052012	0.598216314	2	124	61	6530	0		2	A0A0R4IZY2 Q8CG70
GO:0035639	purine ribonucleoside triphosphate binding	MF	0.327765649	0.601753927	21	124	885	6530	18	A0A0A0MQA5 A0A286YDJ5 A2A4P4 B1AQZ0 D1FNM9 F7BP55 O08989 P83741 Q03145 Q3TII3 Q5NCI0 Q6NZL1 Q8BN21 Q8BZ03 Q8K119 Q99PU8 Q9CY28 Q9ER41	3	O35495 P56371 Q9CTN4
GO:0006259	DNA metabolic process	BP	0.330027729	0.601753927	4	124	136	6530	2	Q8K119 Q91YN8	2	G4V4Z1 Q3UJF5
GO:0032550	purine ribonucleoside binding	MF	0.330488258	0.601753927	21	124	886	6530	18	A0A0A0MQA5 A0A286YDJ5 A2A4P4 B1AQZ0 D1FNM9 F7BP55 O08989 P83741 Q03145 Q3TII3 Q5NCI0 Q6NZL1 Q8BN21 Q8BZ03 Q8K119 Q99PU8 Q9CY28 Q9ER41	3	O35495 P56371 Q9CTN4
GO:0032555	purine ribonucleotide binding	MF	0.333222643	0.602864874	21	124	887	6530	18	A0A0A0MQA5 A0A286YDJ5 A2A4P4 B1AQZ0 D1FNM9 F7BP55 O08989 P83741 Q03145 Q3TII3 Q5NCI0 Q6NZL1 Q8BN21 Q8BZ03 Q8K119 Q99PU8 Q9CY28 Q9ER41	3	O35495 P56371 Q9CTN4
GO:0005667	transcription factor complex	CC	0.344572707	0.608024036	1	124	22	6530	1	Q08639	0
GO:0051287	NAD binding	MF	0.344572707	0.608024036	1	124	22	6530	0		1	Q68FL4
GO:0044712	single-organism catabolic process	BP	0.350925071	0.611152863	2	124	65	6530	1	Q3UJ20	1	Q68FL4
GO:0003899	DNA-directed RNA polymerase activity	MF	0.369312978	0.629078656	1	124	24	6530	0		1	A0A1D5RML8
GO:0022890	inorganic cation transmembrane transporter activity	MF	0.371578345	0.629078656	2	124	68	6530	2	D1FNM9 Q8BGD8	0
GO:0042127	regulation of cell proliferation	BP	0.38133345	0.633142248	1	124	25	6530	1	P46414	0
GO:0003824	catalytic activity	MF	0.390603027	0.639236901	43	124	2008	6530	28	A0A0A0MQA5 A0A1S6GWG9 A0A286YDJ5 A2A4P4 A2ADA5 B7ZMP1 D1FNM9 D3Z286 E9Q2E4 E9Q8A3 F7BP55 G3X940 O89001 P42337 P83741 Q03145 Q3TII3 Q3UJ20 Q3UMG6 Q3V100 Q6NZL1 Q8BGD8 Q8BN21 Q8BVE8 Q8BZ03 Q8VE10 Q99PU8 Q9D8X5	15	A0A1D5RML8 D6RH77 E9PUE3 G4V4Z1 O35495 O88839 P61458 Q3TPJ9 Q3UCV8 Q3UJF5 Q3UL64 Q68FL4 Q8CG70 Q8QZS1 Q9CTN4
GO:0099513	polymeric cytoskeletal fiber	CC	0.391970571	0.639236901	2	124	71	6530	2	A0A0A0MQA5 P46660	0
GO:0008234	cysteine-type peptidase activity	MF	0.398703725	0.645637514	2	124	72	6530	0		2	Q3TPJ9 Q3UCV8
GO:0036094	small molecule binding	MF	0.419522559	0.671065557	23	124	1015	6530	18	A0A0A0MQA5 A0A286YDJ5 A2A4P4 B1AQZ0 D1FNM9 F7BP55 O08989 P83741 Q03145 Q3TII3 Q5NCI0 Q6NZL1 Q8BN21 Q8BZ03 Q8K119 Q99PU8 Q9CY28 Q9ER41	5	O35495 P56371 Q68FL4 Q8CG70 Q9CTN4
GO:0000786	nucleosome	CC	0.427184683	0.675089047	1	124	29	6530	1	G3X940	0
GO:0000166	nucleotide binding	MF	0.441407076	0.689970006	22	124	973	6530	18	A0A0A0MQA5 A0A286YDJ5 A2A4P4 B1AQZ0 D1FNM9 F7BP55 O08989 P83741 Q03145 Q3TII3 Q5NCI0 Q6NZL1 Q8BN21 Q8BZ03 Q8K119 Q99PU8 Q9CY28 Q9ER41	4	O35495 P56371 Q68FL4 Q9CTN4
GO:0046872	metal ion binding	MF	0.44223686	0.689970006	21	124	924	6530	12	A0A0M3HEP2 A0A1S6GWG9 B1AY10 B7ZMP1 D1FNM9 G3X940 O35245 O89001 Q3UJ20 Q3V100 Q8BVE8 Q91YN8	9	A0A0R4IZY2 B2RUR8 F6QC57 G4V4Z1 O89090 P98156 Q80UY2 Q8BFW4 Q8CG70
GO:0005874	microtubule	CC	0.448829677	0.693966515	1	124	31	6530	1	A0A0A0MQA5	0
GO:0005975	carbohydrate metabolic process	BP	0.458431785	0.703317599	3	124	107	6530	3	A0A1S6GWG9 Q3UJ20 Q3V100	0
GO:0007267	cell-cell signaling	BP	0.46966312	0.713561535	1	124	33	6530	1	Q7TMQ1	0
GO:0034641	cellular nitrogen compound metabolic process	BP	0.473161996	0.717492276	18	124	786	6530	10	A0A286YDJ5 A2A4P4 A2ADA5 F7BP55 Q3UJ20 Q3UMG6 Q3V100 Q8K119 Q91YN8 Q9D8X5	8	E9PUE3 E9QJT2 E9QJV4 G4V4Z1 P61458 Q3UJF5 Q68FL4 Q924H2
GO:0016301	kinase activity	MF	0.487179927	0.724447109	9	124	356	6530	8	E9Q8A3 F7BP55 P42337 P83741 Q03145 Q3UMG6 Q8BN21 Q8BZ03	1	O35495
GO:0016567	protein ubiquitination	BP	0.4897152	0.724447109	1	124	35	6530	0		1	A9C491
GO:0043087	regulation of GTPase activity	BP	0.499457358	0.725715217	1	124	36	6530	1	E9PW37	0
GO:0004713	protein tyrosine kinase activity	MF	0.499457358	0.725715217	1	124	36	6530	1	Q03145	0
GO:0015075	ion transmembrane transporter activity	MF	0.507535062	0.725715217	3	124	123	6530	2	D1FNM9 Q8BGD8	1	Q61418
GO:0000287	magnesium ion binding	MF	0.509014994	0.725715217	1	124	37	6530	1	Q3UJ20	0
GO:1902494	catalytic complex	CC	0.534591408	0.731916981	4	124	150	6530	2	G3X940 Q3UJ20	2	A9C491 Q99LM9
GO:0022857	transmembrane transporter activity	MF	0.535794582	0.731916981	4	124	151	6530	3	D1FNM9 Q7TMQ1 Q8BGD8	1	Q61418
GO:0020037	heme binding	MF	0.536615118	0.731916981	1	124	40	6530	0		1	A0A0R4IZY2
GO:0007399	nervous system development	BP	0.536615118	0.731916981	1	124	40	6530	1	P46660	0
GO:0042254	ribosome biogenesis	BP	0.545468697	0.737965392	1	124	41	6530	0		1	E9QJT2
GO:0016772	transferase activity, transferring phosphorus-containing groups	MF	0.547253589	0.737965392	10	124	415	6530	8	E9Q8A3 F7BP55 P42337 P83741 Q03145 Q3UMG6 Q8BN21 Q8BZ03	2	A0A1D5RML8 O35495
GO:0044428	nuclear part	CC	0.550092079	0.737965392	4	124	161	6530	2	G3X940 Q8BV13	2	Q924H2 Q99LM9
GO:0019438	aromatic compound biosynthetic process	BP	0.551728325	0.737965392	4	124	162	6530	2	Q3UMG6 Q3V100	2	P61458 Q924H2
GO:0006511	ubiquitin-dependent protein catabolic process	BP	0.562675547	0.74051113	1	124	43	6530	0		1	A9C491
GO:0035091	phosphatidylinositol binding	MF	0.562675547	0.74051113	1	124	43	6530	0		1	D6RH77
GO:0018130	heterocycle biosynthetic process	BP	0.564085229	0.741127004	4	124	169	6530	2	Q3UMG6 Q3V100	2	P61458 Q924H2
GO:0046983	protein dimerization activity	MF	0.571035071	0.744047353	1	124	44	6530	0		1	A0A1D5RML8
GO:0000278	mitotic cell cycle	BP	0.579236066	0.746086389	1	124	45	6530	1	Q08639	0
GO:1901362	organic cyclic compound biosynthetic process	BP	0.581956406	0.748365509	4	124	178	6530	2	Q3UMG6 Q3V100	2	P61458 Q924H2
GO:0004842	ubiquitin-protein transferase activity	MF	0.587281513	0.749140557	1	124	46	6530	1	E9Q2E4	0
GO:0006955	immune response	BP	0.587281513	0.749140557	1	124	46	6530	0		1	P01887
GO:0000226	microtubule cytoskeleton organization	BP	0.610513569	0.769990671	1	124	49	6530	0		1	A9C491
GO:0006357	regulation of transcription from RNA polymerase II promoter	BP	0.617965555	0.775660114	1	124	50	6530	0		1	Q924H2
GO:0071704	organic substance metabolic process	BP	0.626718571	0.784145494	37	124	1796	6530	21	A0A1S6GWG9 A0A286YDJ5 A2A4P4 A2ADA5 E9Q8A3 F7BP55 G3X940 G3X977 O89001 P42337 P83741 Q03145 Q3UJ20 Q3UMG6 Q3V100 Q61187 Q8BN21 Q8BZ03 Q8K119 Q91YN8 Q9D8X5	16	A9C491 E9PUE3 E9QJT2 E9QJV4 G4V4Z1 O35495 O88839 P49442 P61458 Q3TPJ9 Q3UCV8 Q3UJF5 Q68FL4 Q6A0E5 Q924H2 Q9JI78
GO:0003924	GTPase activity	MF	0.658342587	0.821102402	2	124	77	6530	2	A0A0A0MQA5 Q3TII3	0
GO:0090407	organophosphate biosynthetic process	BP	0.658342587	0.821102402	2	124	77	6530	1	Q3UMG6	1	Q6A0E5
GO:0006281	DNA repair	BP	0.671896504	0.835359477	2	124	83	6530	2	Q8K119 Q91YN8	0
GO:0070647	protein modification by small protein conjugation or removal	BP	0.671896504	0.835359477	2	124	83	6530	0		2	A9C491 Q3UCV8
GO:0015630	microtubule cytoskeleton	CC	0.674278638	0.835680768	2	124	84	6530	2	A0A0A0MQA5 E9Q9M0	0
GO:1901137	carbohydrate derivative biosynthetic process	BP	0.674278638	0.835680768	2	124	84	6530	2	Q3UMG6 Q3V100	0
GO:0004674	protein serine/threonine kinase activity	MF	0.694239695	0.849714837	2	124	92	6530	2	P83741 Q8BZ03	0
GO:0044237	cellular metabolic process	BP	0.711221695	0.863783138	32	124	1567	6530	18	A0A286YDJ5 A2A4P4 A2ADA5 E9Q8A3 F7BP55 G3X940 P42337 P83741 Q03145 Q3UJ20 Q3UMG6 Q3V100 Q61187 Q8BN21 Q8BZ03 Q8K119 Q91YN8 Q9D8X5	14	A9C491 E9PUE3 E9QJT2 E9QJV4 G4V4Z1 O35495 P49442 P61458 Q3UCV8 Q3UJF5 Q68FL4 Q6A0E5 Q924H2 Q9JI78
GO:0005739	mitochondrion	CC	0.71520293	0.867279978	2	124	100	6530	1	Q8BGD8	1	Q8BGX2
GO:0007049	cell cycle	BP	0.723175602	0.86761526	2	124	103	6530	2	P46414 Q08639	0
GO:0006796	phosphate-containing compound metabolic process	BP	0.726640654	0.86761526	11	124	499	6530	8	E9Q8A3 P42337 P83741 Q03145 Q3UJ20 Q3UMG6 Q8BN21 Q8BZ03	3	O35495 P49442 Q6A0E5
GO:0043234	protein complex	CC	0.735188172	0.870064799	12	124	551	6530	6	G3X940 Q08639 Q3UJ20 Q5XJY5 Q7TMQ1 Q8BV13	6	A9C491 P01887 Q8BGX2 Q8CD17 Q924H2 Q99LM9
GO:0005634	nucleus	CC	0.741967367	0.876769246	11	124	502	6530	8	A0A0R4J1I3 B1AY10 E9Q9M0 G3X940 P46414 Q5XJV5 Q8BV13 Q8BVE8	3	Q8C1D8 Q924H2 Q99LM9
GO:0090304	nucleic acid metabolic process	BP	0.748672983	0.880725916	10	124	453	6530	5	A2A4P4 A2ADA5 Q8K119 Q91YN8 Q9D8X5	5	E9QJT2 E9QJV4 G4V4Z1 Q3UJF5 Q924H2
GO:0034654	nucleobase-containing compound biosynthetic process	BP	0.755891905	0.887890939	3	124	145	6530	2	Q3UMG6 Q3V100	1	Q924H2
GO:0006082	organic acid metabolic process	BP	0.762740555	0.894600323	3	124	150	6530	2	A2A4P4 Q3UJ20	1	Q68FL4
GO:0098772	molecular function regulator	MF	0.793896812	0.919627279	4	124	202	6530	3	G3X977 P46414 Q8QZS3	1	P21460
GO:0044238	primary metabolic process	BP	0.832053381	0.954556867	34	124	1710	6530	20	A0A1S6GWG9 A0A286YDJ5 A2A4P4 A2ADA5 E9Q8A3 F7BP55 G3X940 O89001 P42337 P83741 Q03145 Q3UJ20 Q3UMG6 Q3V100 Q61187 Q8BN21 Q8BZ03 Q8K119 Q91YN8 Q9D8X5	14	A9C491 E9PUE3 E9QJT2 E9QJV4 G4V4Z1 O35495 O88839 P49442 Q3TPJ9 Q3UCV8 Q3UJF5 Q68FL4 Q6A0E5 Q924H2
GO:0043231	intracellular membrane-bounded organelle	CC	0.88977367	1	16	124	790	6530	11	A0A0R4J1I3 B1AY10 E9Q9M0 G3X940 P46414 P57759 Q5XJV5 Q5XJY5 Q8BGD8 Q8BV13 Q8BVE8	5	Q8BGX2 Q8C1D8 Q91WS0 Q924H2 Q99LM9
GO:1901564	organonitrogen compound metabolic process	BP	1	1	8	124	406	6530	4	A2A4P4 G3X977 Q3UJ20 Q3UMG6	4	E9PUE3 P61458 Q68FL4 Q6A0E5
GO:0035556	intracellular signal transduction	BP	1	1	6	124	301	6530	4	E9Q8A3 O08989 P42337 Q8BZ03	2	P56371 Q9CTN4
GO:0005524	ATP binding	MF	1	1	13	124	671	6530	12	A0A286YDJ5 A2A4P4 D1FNM9 F7BP55 P83741 Q03145 Q6NZL1 Q8BN21 Q8BZ03 Q8K119 Q99PU8 Q9ER41	1	O35495
GO:0016740	transferase activity	MF	1	1	14	124	713	6530	12	E9Q2E4 E9Q8A3 F7BP55 G3X940 P42337 P83741 Q03145 Q3UMG6 Q8BN21 Q8BVE8 Q8BZ03 Q8VE10	2	A0A1D5RML8 O35495
