# Supplementary material for: GDF11 Regulates PC12 Neural Stem Cells via ALK5-Dependent PI3K-Akt Signaling Pathway
Source: Int J Mol Sci. 2022 Oct 14;23(20):12279. doi: 10.3390/ijms232012279 (PMC9602726; doi:10.3390/ijms232012279)
Supplement: Supplementary file 1 [file ijms-23-12279-s001.zip › Table S4.xls]

## Sheet: Sheet1
Block	Column	Row	Name	ID
1	1	1	Position Marker	P
1	2	1	Empty	E
1	3	1	Empty	E
1	4	1	Tubulin-b	1
1	5	1	GAPDH	2
1	6	1	GSK3 alpha/beta (Phospho-Tyr216/279)	3
1	7	1	GSK3 beta	4
1	8	1	GSK3 beta (Phospho-Ser9)	5
1	9	1	c-Jun	6
1	10	1	c-Jun (Phospho-Ser73)	7
1	11	1	Elk1	8
1	12	1	Elk1 (Phospho-Ser383)	9
1	13	1	PDK	10
1	14	1	PDK1 (Phospho-Ser241)	11
1	15	1	Raf1	12
1	16	1	Raf1 (Phospho-Ser259)	13
1	17	1	NFkB-p100/p52	14
1	18	1	NFkB-p100/p52 (Phospho-Ser865)	15
1	19	1	NFkB-p105/p50	16
1	20	1	NFkB-p105/p50 (Phospho-Ser337)	17
1	21	1	JunB	18
1	22	1	JunB (Phospho-Ser259)	19
1	23	1	ATF2	20
1	24	1	ATF2 (Phospho-Ser62/44)	21
1	25	1	STAT1	22
1	26	1	STAT1 (Phospho-Tyr701)	23
1	27	1	STAT3	24
1	28	1	STAT3 (Phospho-Tyr705)	25
1	29	1	STAT4	26
1	30	1	STAT4 (Phospho-Tyr693)	27
1	31	1	STAT5A	28
1	32	1	STAT5A (Phospho-Tyr694)	29
1	1	2	Position Marker	P
1	2	2	Empty	E
1	3	2	Empty	E
1	4	2	Tubulin-b	1
1	5	2	GAPDH	2
1	6	2	GSK3 alpha/beta (Phospho-Tyr216/279)	3
1	7	2	GSK3 beta	4
1	8	2	GSK3 beta (Phospho-Ser9)	5
1	9	2	c-Jun	6
1	10	2	c-Jun (Phospho-Ser73)	7
1	11	2	Elk1	8
1	12	2	Elk1 (Phospho-Ser383)	9
1	13	2	PDK1	10
1	14	2	PDK1 (Phospho-Ser241)	11
1	15	2	Raf1	12
1	16	2	Raf1 (Phospho-Ser259)	13
1	17	2	NFkB-p100/p52	14
1	18	2	NFkB-p100/p52 (Phospho-Ser865)	15
1	19	2	NFkB-p105/p50	16
1	20	2	NFkB-p105/p50 (Phospho-Ser337)	17
1	21	2	JunB	18
1	22	2	JunB (Phospho-Ser259)	19
1	23	2	ATF2	20
1	24	2	ATF2 (Phospho-Ser62/44)	21
1	25	2	STAT1	22
1	26	2	STAT1 (Phospho-Tyr701)	23
1	27	2	STAT3	24
1	28	2	STAT3 (Phospho-Tyr705)	25
1	29	2	STAT4	26
1	30	2	STAT4 (Phospho-Tyr693)	27
1	31	2	STAT5A	28
1	32	2	STAT5A (Phospho-Tyr694)	29
1	1	3	Position Marker	P
1	2	3	Empty	E
1	3	3	Empty	E
1	4	3	Tubulin-b	1
1	5	3	GAPDH	2
1	6	3	GSK3 alpha/beta (Phospho-Tyr216/279)	3
1	7	3	GSK3 beta	4
1	8	3	GSK3 beta (Phospho-Ser9)	5
1	9	3	c-Jun	6
1	10	3	c-Jun (Phospho-Ser73)	7
1	11	3	Elk1	8
1	12	3	Elk1 (Phospho-Ser383)	9
1	13	3	PDK1	10
1	14	3	PDK1 (Phospho-Ser241)	11
1	15	3	Raf1	12
1	16	3	Raf1 (Phospho-Ser259)	13
1	17	3	NFkB-p100/p52	14
1	18	3	NFkB-p100/p52 (Phospho-Ser865)	15
1	19	3	NFkB-p105/p50	16
1	20	3	NFkB-p105/p50 (Phospho-Ser337)	17
1	21	3	JunB	18
1	22	3	JunB (Phospho-Ser259)	19
1	23	3	ATF2	20
1	24	3	ATF2 (Phospho-Ser62/44)	21
1	25	3	STAT1	22
1	26	3	STAT1 (Phospho-Tyr701)	23
1	27	3	STAT3	24
1	28	3	STAT3 (Phospho-Tyr705)	25
1	29	3	STAT4	26
1	30	3	STAT4 (Phospho-Tyr693)	27
1	31	3	STAT5A	28
1	32	3	STAT5A (Phospho-Tyr694)	29
1	1	4	Position Marker	P
1	2	4	Empty	E
1	3	4	Empty	E
1	4	4	Tubulin-b	1
1	5	4	GAPDH	2
1	6	4	GSK3 alpha/beta (Phospho-Tyr216/279)	3
1	7	4	GSK3 beta	4
1	8	4	GSK3 beta (Phospho-Ser9)	5
1	9	4	c-Jun	6
1	10	4	c-Jun (Phospho-Ser73)	7
1	11	4	Elk1	8
1	12	4	Elk1 (Phospho-Ser383)	9
1	13	4	PDK1	10
1	14	4	PDK1 (Phospho-Ser241)	11
1	15	4	Raf1	12
1	16	4	Raf1 (Phospho-Ser259)	13
1	17	4	NFkB-p100/p52	14
1	18	4	NFkB-p100/p52 (Phospho-Ser865)	15
1	19	4	NFkB-p105/p50	16
1	20	4	NFkB-p105/p50 (Phospho-Ser337)	17
1	21	4	JunB	18
1	22	4	JunB (Phospho-Ser259)	19
1	23	4	ATF2	20
1	24	4	ATF2 (Phospho-Ser62/44)	21
1	25	4	STAT1	22
1	26	4	STAT1 (Phospho-Tyr701)	23
1	27	4	STAT3	24
1	28	4	STAT3 (Phospho-Tyr705)	25
1	29	4	STAT4	26
1	30	4	STAT4 (Phospho-Tyr693)	27
1	31	4	STAT5A	28
1	32	4	STAT5A (Phospho-Tyr694)	29
1	1	5	Position Marker	P
1	2	5	Empty	E
1	3	5	Empty	E
1	4	5	Tubulin-b	1
1	5	5	GAPDH	2
1	6	5	GSK3 alpha/beta (Phospho-Tyr216/279)	3
1	7	5	GSK3 beta	4
1	8	5	GSK3 beta (Phospho-Ser9)	5
1	9	5	c-Jun	6
1	10	5	c-Jun (Phospho-Ser73)	7
1	11	5	Elk1	8
1	12	5	Elk1 (Phospho-Ser383)	9
1	13	5	PDK1	10
1	14	5	PDK1 (Phospho-Ser241)	11
1	15	5	Raf1	12
1	16	5	Raf1 (Phospho-Ser259)	13
1	17	5	NFkB-p100/p52	14
1	18	5	NFkB-p100/p52 (Phospho-Ser865)	15
1	19	5	NFkB-p105/p50	16
1	20	5	NFkB-p105/p50 (Phospho-Ser337)	17
1	21	5	JunB	18
1	22	5	JunB (Phospho-Ser259)	19
1	23	5	ATF2	20
1	24	5	ATF2 (Phospho-Ser62/44)	21
1	25	5	STAT1	22
1	26	5	STAT1 (Phospho-Tyr701)	23
1	27	5	STAT3	24
1	28	5	STAT3 (Phospho-Tyr705)	25
1	29	5	STAT4	26
1	30	5	STAT4 (Phospho-Tyr693)	27
1	31	5	STAT5A	28
1	32	5	STAT5A (Phospho-Tyr694)	29
1	1	6	Position Marker	P
1	2	6	Empty	E
1	3	6	Empty	E
1	4	6	Tubulin-b	1
1	5	6	GAPDH	2
1	6	6	GSK3 alpha/beta (Phospho-Tyr216/279)	3
1	7	6	GSK3 beta	4
1	8	6	GSK3 beta (Phospho-Ser9)	5
1	9	6	c-Jun	6
1	10	6	c-Jun (Phospho-Ser73)	7
1	11	6	Elk1	8
1	12	6	Elk1 (Phospho-Ser383)	9
1	13	6	PDK1	10
1	14	6	PDK1 (Phospho-Ser241)	11
1	15	6	Raf1	12
1	16	6	Raf1 (Phospho-Ser259)	13
1	17	6	NFkB-p100/p52	14
1	18	6	NFkB-p100/p52 (Phospho-Ser865)	15
1	19	6	NFkB-p105/p50	16
1	20	6	NFkB-p105/p50 (Phospho-Ser337)	17
1	21	6	JunB	18
1	22	6	JunB (Phospho-Ser259)	19
1	23	6	ATF2	20
1	24	6	ATF2 (Phospho-Ser62/44)	21
1	25	6	STAT1	22
1	26	6	STAT1 (Phospho-Tyr701)	23
1	27	6	STAT3	24
1	28	6	STAT3 (Phospho-Tyr705)	25
1	29	6	STAT4	26
1	30	6	STAT4 (Phospho-Tyr693)	27
1	31	6	STAT5A	28
1	32	6	STAT5A (Phospho-Tyr694)	29
2	1	1	STAT6	30
2	2	1	STAT6 (Phospho-Thr645)	31
2	3	1	CREB	32
2	4	1	CREB (Phospho-Ser133)	33
2	5	1	AKT	34
2	6	1	AKT1	35
2	7	1	AKT1 (Phospho-Ser473)	36
2	8	1	AKT1 (Phospho-Thr308)	37
2	9	1	PTEN	38
2	10	1	PTEN (Phospho-Ser380/Thr392/Thr383)	39
2	11	1	P73	40
2	12	1	P73 (Phospho-Tyr99)	41
2	13	1	Integrin beta-3	42
2	14	1	Integrin beta-3 (Phospho-Tyr773)	43
2	15	1	Chk2	44
2	16	1	Chk2 (Phospho-Thr68)	45
2	17	1	BCL-2 (Phospho-Ser70)	46
2	18	1	BCL-XL	47
2	19	1	BCL-XL (Phospho-Ser62)	48
2	20	1	BAD (Phospho-Ser136)	49
2	21	1	HER2	50
2	22	1	HER2 (Phospho-Tyr1221/Tyr1222)	51
2	23	1	HER2 (Phospho-Tyr1248)	52
2	24	1	VEGFR2	53
2	25	1	VEGFR2 (Phospho-Tyr1175)	54
2	26	1	VEGFR2 (Phospho-Tyr1214)	55
2	27	1	IGF1R	56
2	28	1	IGF1R (Phospho-Tyr1165/1166)	57
2	29	1	Src	58
2	30	1	Src (Phospho-Tyr418)	59
2	31	1	p53	60
2	32	1	p53 (Phospho-Ser9)	61
2	1	2	STAT6	30
2	2	2	STAT6 (Phospho-Thr645)	31
2	3	2	CREB	32
2	4	2	CREB (Phospho-Ser133)	33
2	5	2	AKT	34
2	6	2	AKT1	35
2	7	2	AKT1 (Phospho-Ser473)	36
2	8	2	AKT1 (Phospho-Thr308)	37
2	9	2	PTEN	38
2	10	2	PTEN (Phospho-Ser380/Thr392/Thr383)	39
2	11	2	P73	40
2	12	2	P73 (Phospho-Tyr99)	41
2	13	2	Integrin beta-3	42
2	14	2	Integrin beta-3 (Phospho-Tyr773)	43
2	15	2	Chk2	44
2	16	2	Chk2 (Phospho-Thr68)	45
2	17	2	BCL-2 (Phospho-Ser70)	46
2	18	2	BCL-XL	47
2	19	2	BCL-XL (Phospho-Ser62)	48
2	20	2	BAD (Phospho-Ser136)	49
2	21	2	HER2	50
2	22	2	HER2 (Phospho-Tyr1221/Tyr1222)	51
2	23	2	HER2 (Phospho-Tyr1248)	52
2	24	2	VEGFR2	53
2	25	2	VEGFR2 (Phospho-Tyr1175)	54
2	26	2	VEGFR2 (Phospho-Tyr1214)	55
2	27	2	IGF1R	56
2	28	2	IGF1R (Phospho-Tyr1165/1166)	57
2	29	2	Src	58
2	30	2	Src (Phospho-Tyr418)	59
2	31	2	p53	60
2	32	2	p53 (Phospho-Ser9)	61
2	1	3	STAT6	30
2	2	3	STAT6 (Phospho-Thr645)	31
2	3	3	CREB	32
2	4	3	CREB (Phospho-Ser133)	33
2	5	3	AKT	34
2	6	3	AKT1	35
2	7	3	AKT1 (Phospho-Ser473)	36
2	8	3	AKT1 (Phospho-Thr308)	37
2	9	3	PTEN	38
2	10	3	PTEN (Phospho-Ser380/Thr392/Thr383)	39
2	11	3	P73	40
2	12	3	P73 (Phospho-Tyr99)	41
2	13	3	Integrin beta-3	42
2	14	3	Integrin beta-3 (Phospho-Tyr773)	43
2	15	3	Chk2	44
2	16	3	Chk2 (Phospho-Thr68)	45
2	17	3	BCL-2 (Phospho-Ser70)	46
2	18	3	BCL-XL	47
2	19	3	BCL-XL (Phospho-Ser62)	48
2	20	3	BAD (Phospho-Ser136)	49
2	21	3	HER2	50
2	22	3	HER2 (Phospho-Tyr1221/Tyr1222)	51
2	23	3	HER2 (Phospho-Tyr1248)	52
2	24	3	VEGFR2	53
2	25	3	VEGFR2 (Phospho-Tyr1175)	54
2	26	3	VEGFR2 (Phospho-Tyr1214)	55
2	27	3	IGF1R	56
2	28	3	IGF1R (Phospho-Tyr1165/1166)	57
2	29	3	Src	58
2	30	3	Src (Phospho-Tyr418)	59
2	31	3	p53	60
2	32	3	p53 (Phospho-Ser9)	61
2	1	4	STAT6	30
2	2	4	STAT6 (Phospho-Thr645)	31
2	3	4	CREB	32
2	4	4	CREB (Phospho-Ser133)	33
2	5	4	AKT	34
2	6	4	AKT1	35
2	7	4	AKT1 (Phospho-Ser473)	36
2	8	4	AKT1 (Phospho-Thr308)	37
2	9	4	PTEN	38
2	10	4	PTEN (Phospho-Ser380/Thr392/Thr383)	39
2	11	4	P73	40
2	12	4	P73 (Phospho-Tyr99)	41
2	13	4	Integrin beta-3	42
2	14	4	Integrin beta-3 (Phospho-Tyr773)	43
2	15	4	Chk2	44
2	16	4	Chk2 (Phospho-Thr68)	45
2	17	4	BCL-2 (Phospho-Ser70)	46
2	18	4	BCL-XL	47
2	19	4	BCL-XL (Phospho-Ser62)	48
2	20	4	BAD (Phospho-Ser136)	49
2	21	4	HER2	50
2	22	4	HER2 (Phospho-Tyr1221/Tyr1222)	51
2	23	4	HER2 (Phospho-Tyr1248)	52
2	24	4	VEGFR2	53
2	25	4	VEGFR2 (Phospho-Tyr1175)	54
2	26	4	VEGFR2 (Phospho-Tyr1214)	55
2	27	4	IGF1R	56
2	28	4	IGF1R (Phospho-Tyr1165/1166)	57
2	29	4	Src	58
2	30	4	Src (Phospho-Tyr418)	59
2	31	4	p53	60
2	32	4	p53 (Phospho-Ser9)	61
2	1	5	STAT6	30
2	2	5	STAT6 (Phospho-Thr645)	31
2	3	5	CREB	32
2	4	5	CREB (Phospho-Ser133)	33
2	5	5	AKT	34
2	6	5	AKT1	35
2	7	5	AKT1 (Phospho-Ser473)	36
2	8	5	AKT1 (Phospho-Thr308)	37
2	9	5	PTEN	38
2	10	5	PTEN (Phospho-Ser380/Thr392/Thr383)	39
2	11	5	P73	40
2	12	5	P73 (Phospho-Tyr99)	41
2	13	5	Integrin beta-3	42
2	14	5	Integrin beta-3 (Phospho-Tyr773)	43
2	15	5	Chk2	44
2	16	5	Chk2 (Phospho-Thr68)	45
2	17	5	BCL-2 (Phospho-Ser70)	46
2	18	5	BCL-XL	47
2	19	5	BCL-XL (Phospho-Ser62)	48
2	20	5	BAD (Phospho-Ser136)	49
2	21	5	HER2	50
2	22	5	HER2 (Phospho-Tyr1221/Tyr1222)	51
2	23	5	HER2 (Phospho-Tyr1248)	52
2	24	5	VEGFR2	53
2	25	5	VEGFR2 (Phospho-Tyr1175)	54
2	26	5	VEGFR2 (Phospho-Tyr1214)	55
2	27	5	IGF1R	56
2	28	5	IGF1R (Phospho-Tyr1165/1166)	57
2	29	5	Src	58
2	30	5	Src (Phospho-Tyr418)	59
2	31	5	p53	60
2	32	5	p53 (Phospho-Ser9)	61
2	1	6	STAT6	30
2	2	6	STAT6 (Phospho-Thr645)	31
2	3	6	CREB	32
2	4	6	CREB (Phospho-Ser133)	33
2	5	6	AKT	34
2	6	6	AKT1	35
2	7	6	AKT1 (Phospho-Ser473)	36
2	8	6	AKT1 (Phospho-Thr308)	37
2	9	6	PTEN	38
2	10	6	PTEN (Phospho-Ser380/Thr392/Thr383)	39
2	11	6	P73	40
2	12	6	P73 (Phospho-Tyr99)	41
2	13	6	Integrin beta-3	42
2	14	6	Integrin beta-3 (Phospho-Tyr773)	43
2	15	6	Chk2	44
2	16	6	Chk2 (Phospho-Thr68)	45
2	17	6	BCL-2 (Phospho-Ser70)	46
2	18	6	BCL-XL	47
2	19	6	BCL-XL (Phospho-Ser62)	48
2	20	6	BAD (Phospho-Ser136)	49
2	21	6	HER2	50
2	22	6	HER2 (Phospho-Tyr1221/Tyr1222)	51
2	23	6	HER2 (Phospho-Tyr1248)	52
2	24	6	VEGFR2	53
2	25	6	VEGFR2 (Phospho-Tyr1175)	54
2	26	6	VEGFR2 (Phospho-Tyr1214)	55
2	27	6	IGF1R	56
2	28	6	IGF1R (Phospho-Tyr1165/1166)	57
2	29	6	Src	58
2	30	6	Src (Phospho-Tyr418)	59
2	31	6	p53	60
2	32	6	p53 (Phospho-Ser9)	61
3	1	1	p53 (Phospho-Ser15)	62
3	2	1	p53 (Phospho-Ser315)	63
3	3	1	Tau	64
3	4	1	Tau (Phospho-Ser396)	65
3	5	1	Tau (Phospho-Ser235)	66
3	6	1	Catenin beta	67
3	7	1	Catenin beta (Phospho-Thr41/Ser45)	68
3	8	1	CDC25C	69
3	9	1	CDC25C (Phospho-Ser216)	70
3	10	1	AKT2	71
3	11	1	AKT2 (Phospho-Ser474)	72
3	12	1	c-Abl	73
3	13	1	c-Abl (Phospho-Tyr412)	74
3	14	1	Rb	75
3	15	1	Rb (Phospho-Ser608)	76
3	16	1	Rb (Phospho-Ser807)	77
3	17	1	IRS-1	78
3	18	1	IRS-1 (Phospho-Ser312)	79
3	19	1	LCK	80
3	20	1	LCK (Phospho-Tyr393)	81
3	21	1	JAK1	82
3	22	1	JAK1 (Phospho-Tyr1022)	83
3	23	1	JAK2	84
3	24	1	JAK2 (Phospho-Tyr221)	85
3	25	1	JAK2 (Phospho-Tyr1007)	86
3	26	1	IkB-alpha	87
3	27	1	IkB-alpha (Phospho-Ser32/36)	88
3	28	1	FKHRL1/FOXO3A	89
3	29	1	FKHRL1/FOXO3A (Phospho-Ser253)	90
3	30	1	Zap-70	91
3	31	1	Zap-70 (Phospho-Tyr319)	92
3	32	1	HDAC2	93
3	1	2	p53 (Phospho-Ser15)	62
3	2	2	p53 (Phospho-Ser315)	63
3	3	2	Tau	64
3	4	2	Tau (Phospho-Ser396)	65
3	5	2	Tau (Phospho-Ser235)	66
3	6	2	Catenin beta	67
3	7	2	Catenin beta (Phospho-Thr41/Ser45)	68
3	8	2	CDC25C	69
3	9	2	CDC25C (Phospho-Ser216)	70
3	10	2	AKT2	71
3	11	2	AKT2 (Phospho-Ser474)	72
3	12	2	c-Abl	73
3	13	2	c-Abl (Phospho-Tyr412)	74
3	14	2	Rb	75
3	15	2	Rb (Phospho-Ser608)	76
3	16	2	Rb (Phospho-Ser807)	77
3	17	2	IRS-1	78
3	18	2	IRS-1 (Phospho-Ser312)	79
3	19	2	LCK	80
3	20	2	LCK (Phospho-Tyr393)	81
3	21	2	JAK1	82
3	22	2	JAK1 (Phospho-Tyr1022)	83
3	23	2	JAK2	84
3	24	2	JAK2 (Phospho-Tyr221)	85
3	25	2	JAK2 (Phospho-Tyr1007)	86
3	26	2	IkB-alpha	87
3	27	2	IkB-alpha (Phospho-Ser32/36)	88
3	28	2	FKHRL1/FOXO3A	89
3	29	2	FKHRL1/FOXO3A (Phospho-Ser253)	90
3	30	2	Zap-70	91
3	31	2	Zap-70 (Phospho-Tyr319)	92
3	32	2	HDAC2	93
3	1	3	p53 (Phospho-Ser15)	62
3	2	3	p53 (Phospho-Ser315)	63
3	3	3	Tau	64
3	4	3	Tau (Phospho-Ser396)	65
3	5	3	Tau (Phospho-Ser235)	66
3	6	3	Catenin beta	67
3	7	3	Catenin beta (Phospho-Thr41/Ser45)	68
3	8	3	CDC25C	69
3	9	3	CDC25C (Phospho-Ser216)	70
3	10	3	AKT2	71
3	11	3	AKT2 (Phospho-Ser474)	72
3	12	3	c-Abl	73
3	13	3	c-Abl (Phospho-Tyr412)	74
3	14	3	Rb	75
3	15	3	Rb (Phospho-Ser608)	76
3	16	3	Rb (Phospho-Ser807)	77
3	17	3	IRS-1	78
3	18	3	IRS-1 (Phospho-Ser312)	79
3	19	3	LCK	80
3	20	3	LCK (Phospho-Tyr393)	81
3	21	3	JAK1	82
3	22	3	JAK1 (Phospho-Tyr1022)	83
3	23	3	JAK2	84
3	24	3	JAK2 (Phospho-Tyr221)	85
3	25	3	JAK2 (Phospho-Tyr1007)	86
3	26	3	IkB-alpha	87
3	27	3	IkB-alpha (Phospho-Ser32/36)	88
3	28	3	FKHRL1/FOXO3A	89
3	29	3	FKHRL1/FOXO3A (Phospho-Ser253)	90
3	30	3	Zap-70	91
3	31	3	Zap-70 (Phospho-Tyr319)	92
3	32	3	HDAC2	93
3	1	4	p53 (Phospho-Ser15)	62
3	2	4	p53 (Phospho-Ser315)	63
3	3	4	Tau	64
3	4	4	Tau (Phospho-Ser396)	65
3	5	4	Tau (Phospho-Ser235)	66
3	6	4	Catenin beta	67
3	7	4	Catenin beta (Phospho-Thr41/Ser45)	68
3	8	4	CDC25C	69
3	9	4	CDC25C (Phospho-Ser216)	70
3	10	4	AKT2	71
3	11	4	AKT2 (Phospho-Ser474)	72
3	12	4	c-Abl	73
3	13	4	c-Abl (Phospho-Tyr412)	74
3	14	4	Rb	75
3	15	4	Rb (Phospho-Ser608)	76
3	16	4	Rb (Phospho-Ser807)	77
3	17	4	IRS-1	78
3	18	4	IRS-1 (Phospho-Ser312)	79
3	19	4	LCK	80
3	20	4	LCK (Phospho-Tyr393)	81
3	21	4	JAK1	82
3	22	4	JAK1 (Phospho-Tyr1022)	83
3	23	4	JAK2	84
3	24	4	JAK2 (Phospho-Tyr221)	85
3	25	4	JAK2 (Phospho-Tyr1007)	86
3	26	4	IkB-alpha	87
3	27	4	IkB-alpha (Phospho-Ser32/36)	88
3	28	4	FKHRL1/FOXO3A	89
3	29	4	FKHRL1/FOXO3A (Phospho-Ser253)	90
3	30	4	Zap-70	91
3	31	4	Zap-70 (Phospho-Tyr319)	92
3	32	4	HDAC2	93
3	1	5	p53 (Phospho-Ser15)	62
3	2	5	p53 (Phospho-Ser315)	63
3	3	5	Tau	64
3	4	5	Tau (Phospho-Ser396)	65
3	5	5	Tau (Phospho-Ser235)	66
3	6	5	Catenin beta	67
3	7	5	Catenin beta (Phospho-Thr41/Ser45)	68
3	8	5	CDC25C	69
3	9	5	CDC25C (Phospho-Ser216)	70
3	10	5	AKT2	71
3	11	5	AKT2 (Phospho-Ser474)	72
3	12	5	c-Abl	73
3	13	5	c-Abl (Phospho-Tyr412)	74
3	14	5	Rb	75
3	15	5	Rb (Phospho-Ser608)	76
3	16	5	Rb (Phospho-Ser807)	77
3	17	5	IRS-1	78
3	18	5	IRS-1 (Phospho-Ser312)	79
3	19	5	LCK	80
3	20	5	LCK (Phospho-Tyr393)	81
3	21	5	JAK1	82
3	22	5	JAK1 (Phospho-Tyr1022)	83
3	23	5	JAK2	84
3	24	5	JAK2 (Phospho-Tyr221)	85
3	25	5	JAK2 (Phospho-Tyr1007)	86
3	26	5	IkB-alpha	87
3	27	5	IkB-alpha (Phospho-Ser32/36)	88
3	28	5	FKHRL1/FOXO3A	89
3	29	5	FKHRL1/FOXO3A (Phospho-Ser253)	90
3	30	5	Zap-70	91
3	31	5	Zap-70 (Phospho-Tyr319)	92
3	32	5	HDAC2	93
3	1	6	p53 (Phospho-Ser15)	62
3	2	6	p53 (Phospho-Ser315)	63
3	3	6	Tau	64
3	4	6	Tau (Phospho-Ser396)	65
3	5	6	Tau (Phospho-Ser235)	66
3	6	6	Catenin beta	67
3	7	6	Catenin beta (Phospho-Thr41/Ser45)	68
3	8	6	CDC25C	69
3	9	6	CDC25C (Phospho-Ser216)	70
3	10	6	AKT2	71
3	11	6	AKT2 (Phospho-Ser474)	72
3	12	6	c-Abl	73
3	13	6	c-Abl (Phospho-Tyr412)	74
3	14	6	Rb	75
3	15	6	Rb (Phospho-Ser608)	76
3	16	6	Rb (Phospho-Ser807)	77
3	17	6	IRS-1	78
3	18	6	IRS-1 (Phospho-Ser312)	79
3	19	6	LCK	80
3	20	6	LCK (Phospho-Tyr393)	81
3	21	6	JAK1	82
3	22	6	JAK1 (Phospho-Tyr1022)	83
3	23	6	JAK2	84
3	24	6	JAK2 (Phospho-Tyr221)	85
3	25	6	JAK2 (Phospho-Tyr1007)	86
3	26	6	IkB-alpha	87
3	27	6	IkB-alpha (Phospho-Ser32/36)	88
3	28	6	FKHRL1/FOXO3A	89
3	29	6	FKHRL1/FOXO3A (Phospho-Ser253)	90
3	30	6	Zap-70	91
3	31	6	Zap-70 (Phospho-Tyr319)	92
3	32	6	HDAC2	93
4	1	1	HDAC2 (Phospho-Ser394)	94
4	2	1	MEK1	95
4	3	1	MEK1 (Phospho-Ser221)	96
4	4	1	MEK1 (Phospho-Ser217)	97
4	5	1	MKK4/SEK1	98
4	6	1	MKK4/SEK1 (Phospho-Thr261)	99
4	7	1	ASK1	100
4	8	1	ASK1 (Phospho-Ser966)	101
4	9	1	HSP27	102
4	10	1	HSP27 (Phospho-Ser15)	103
4	11	1	HSP27 (Phospho-Ser82)	104
4	12	1	MSK1	105
4	13	1	MSK1 (Phospho-Ser376)	106
4	14	1	p21Cip1	107
4	15	1	p21Cip1 (Phospho-Thr145)	108
4	16	1	VASP	109
4	17	1	VASP (Phospho-Ser157)	110
4	18	1	NFkB-p65	111
4	19	1	NFkB-p65 (Phospho-Ser529)	112
4	20	1	NFkB-p65 (Phospho-Ser311)	113
4	21	1	EGFR	114
4	22	1	EGFR (Phospho-Tyr1172)	115
4	23	1	EGFR (Phospho-Tyr869)	116
4	24	1	mTOR	117
4	25	1	mTOR (Phospho-Ser2448)	118
4	26	1	mTOR (Phospho-Ser2481)	119
4	27	1	4E-BP1	120
4	28	1	4E-BP1 (Phospho-Thr45)	121
4	29	1	Met	122
4	30	1	Met (Phospho-Tyr1234)	123
4	31	1	elF4E	124
4	32	1	elF4E (Phospho-Ser209)	125
4	1	2	HDAC2 (Phospho-Ser394)	94
4	2	2	MEK1	95
4	3	2	MEK1 (Phospho-Ser221)	96
4	4	2	MEK1 (Phospho-Ser217)	97
4	5	2	MKK4/SEK1	98
4	6	2	MKK4/SEK1 (Phospho-Thr261)	99
4	7	2	ASK1	100
4	8	2	ASK1 (Phospho-Ser966)	101
4	9	2	HSP27	102
4	10	2	HSP27 (Phospho-Ser15)	103
4	11	2	HSP27 (Phospho-Ser82)	104
4	12	2	MSK1	105
4	13	2	MSK1 (Phospho-Ser376)	106
4	14	2	p21Cip1	107
4	15	2	p21Cip1 (Phospho-Thr145)	108
4	16	2	VASP	109
4	17	2	VASP (Phospho-Ser157)	110
4	18	2	NFkB-p65	111
4	19	2	NFkB-p65 (Phospho-Ser529)	112
4	20	2	NFkB-p65 (Phospho-Ser311)	113
4	21	2	EGFR	114
4	22	2	EGFR (Phospho-Tyr1172)	115
4	23	2	EGFR (Phospho-Tyr869)	116
4	24	2	mTOR	117
4	25	2	mTOR (Phospho-Ser2448)	118
4	26	2	mTOR (Phospho-Ser2481)	119
4	27	2	4E-BP1	120
4	28	2	4E-BP1 (Phospho-Thr45)	121
4	29	2	Met	122
4	30	2	Met (Phospho-Tyr1234)	123
4	31	2	elF4E	124
4	32	2	elF4E (Phospho-Ser209)	125
4	1	3	HDAC2 (Phospho-Ser394)	94
4	2	3	MEK1	95
4	3	3	MEK1 (Phospho-Ser221)	96
4	4	3	MEK1 (Phospho-Ser217)	97
4	5	3	MKK4/SEK1	98
4	6	3	MKK4/SEK1 (Phospho-Thr261)	99
4	7	3	ASK1	100
4	8	3	ASK1 (Phospho-Ser966)	101
4	9	3	HSP27	102
4	10	3	HSP27 (Phospho-Ser15)	103
4	11	3	HSP27 (Phospho-Ser82)	104
4	12	3	MSK1	105
4	13	3	MSK1 (Phospho-Ser376)	106
4	14	3	p21Cip1	107
4	15	3	p21Cip1 (Phospho-Thr145)	108
4	16	3	VASP	109
4	17	3	VASP (Phospho-Ser157)	110
4	18	3	NFkB-p65	111
4	19	3	NFkB-p65 (Phospho-Ser529)	112
4	20	3	NFkB-p65 (Phospho-Ser311)	113
4	21	3	EGFR	114
4	22	3	EGFR (Phospho-Tyr1172)	115
4	23	3	EGFR (Phospho-Tyr869)	116
4	24	3	mTOR	117
4	25	3	mTOR (Phospho-Ser2448)	118
4	26	3	mTOR (Phospho-Ser2481)	119
4	27	3	4E-BP1	120
4	28	3	4E-BP1 (Phospho-Thr45)	121
4	29	3	Met	122
4	30	3	Met (Phospho-Tyr1234)	123
4	31	3	elF4E	124
4	32	3	elF4E (Phospho-Ser209)	125
4	1	4	HDAC2 (Phospho-Ser394)	94
4	2	4	MEK1	95
4	3	4	MEK1 (Phospho-Ser221)	96
4	4	4	MEK1 (Phospho-Ser217)	97
4	5	4	MKK4/SEK1	98
4	6	4	MKK4/SEK1 (Phospho-Thr261)	99
4	7	4	ASK1	100
4	8	4	ASK1 (Phospho-Ser966)	101
4	9	4	HSP27	102
4	10	4	HSP27 (Phospho-Ser15)	103
4	11	4	HSP27 (Phospho-Ser82)	104
4	12	4	MSK1	105
4	13	4	MSK1 (Phospho-Ser376)	106
4	14	4	p21Cip1	107
4	15	4	p21Cip1 (Phospho-Thr145)	108
4	16	4	VASP	109
4	17	4	VASP (Phospho-Ser157)	110
4	18	4	NFkB-p65	111
4	19	4	NFkB-p65 (Phospho-Ser529)	112
4	20	4	NFkB-p65 (Phospho-Ser311)	113
4	21	4	EGFR	114
4	22	4	EGFR (Phospho-Tyr1172)	115
4	23	4	EGFR (Phospho-Tyr869)	116
4	24	4	mTOR	117
4	25	4	mTOR (Phospho-Ser2448)	118
4	26	4	mTOR (Phospho-Ser2481)	119
4	27	4	4E-BP1	120
4	28	4	4E-BP1 (Phospho-Thr45)	121
4	29	4	Met	122
4	30	4	Met (Phospho-Tyr1234)	123
4	31	4	elF4E	124
4	32	4	elF4E (Phospho-Ser209)	125
4	1	5	HDAC2 (Phospho-Ser394)	94
4	2	5	MEK1	95
4	3	5	MEK1 (Phospho-Ser221)	96
4	4	5	MEK1 (Phospho-Ser217)	97
4	5	5	MKK4/SEK1	98
4	6	5	MKK4/SEK1 (Phospho-Thr261)	99
4	7	5	ASK1	100
4	8	5	ASK1 (Phospho-Ser966)	101
4	9	5	HSP27	102
4	10	5	HSP27 (Phospho-Ser15)	103
4	11	5	HSP27 (Phospho-Ser82)	104
4	12	5	MSK1	105
4	13	5	MSK1 (Phospho-Ser376)	106
4	14	5	p21Cip1	107
4	15	5	p21Cip1 (Phospho-Thr145)	108
4	16	5	VASP	109
4	17	5	VASP (Phospho-Ser157)	110
4	18	5	NFkB-p65	111
4	19	5	NFkB-p65 (Phospho-Ser529)	112
4	20	5	NFkB-p65 (Phospho-Ser311)	113
4	21	5	EGFR	114
4	22	5	EGFR (Phospho-Tyr1172)	115
4	23	5	EGFR (Phospho-Tyr869)	116
4	24	5	mTOR	117
4	25	5	mTOR (Phospho-Ser2448)	118
4	26	5	mTOR (Phospho-Ser2481)	119
4	27	5	4E-BP1	120
4	28	5	4E-BP1 (Phospho-Thr45)	121
4	29	5	Met	122
4	30	5	Met (Phospho-Tyr1234)	123
4	31	5	elF4E	124
4	32	5	elF4E (Phospho-Ser209)	125
4	1	6	HDAC2 (Phospho-Ser394)	94
4	2	6	MEK1	95
4	3	6	MEK1 (Phospho-Ser221)	96
4	4	6	MEK1 (Phospho-Ser217)	97
4	5	6	MKK4/SEK1	98
4	6	6	MKK4/SEK1 (Phospho-Thr261)	99
4	7	6	ASK1	100
4	8	6	ASK1 (Phospho-Ser966)	101
4	9	6	HSP27	102
4	10	6	HSP27 (Phospho-Ser15)	103
4	11	6	HSP27 (Phospho-Ser82)	104
4	12	6	MSK1	105
4	13	6	MSK1 (Phospho-Ser376)	106
4	14	6	p21Cip1	107
4	15	6	p21Cip1 (Phospho-Thr145)	108
4	16	6	VASP	109
4	17	6	VASP (Phospho-Ser157)	110
4	18	6	NFkB-p65	111
4	19	6	NFkB-p65 (Phospho-Ser529)	112
4	20	6	NFkB-p65 (Phospho-Ser311)	113
4	21	6	EGFR	114
4	22	6	EGFR (Phospho-Tyr1172)	115
4	23	6	EGFR (Phospho-Tyr869)	116
4	24	6	mTOR	117
4	25	6	mTOR (Phospho-Ser2448)	118
4	26	6	mTOR (Phospho-Ser2481)	119
4	27	6	4E-BP1	120
4	28	6	4E-BP1 (Phospho-Thr45)	121
4	29	6	Met	122
4	30	6	Met (Phospho-Tyr1234)	123
4	31	6	elF4E	124
4	32	6	elF4E (Phospho-Ser209)	125
5	1	1	BRCA1	126
5	2	1	BRCA1 (Phospho-Ser1423)	127
5	3	1	CDK1/CDC2	128
5	4	1	CDK1/CDC2 (Phospho-Tyr15)	129
5	5	1	p44/42 MAP Kinase	130
5	6	1	p44/42 MAP Kinase (Phospho-Tyr204)	131
5	7	1	SAPK/JNK	132
5	8	1	SAPK/JNK (Phospho-Tyr185)	133
5	9	1	P38 MAPK	134
5	10	1	P38 MAPK (Phospho-Thr180/Tyr182)	135
5	11	1	RelB	136
5	12	1	RelB (Phospho-Ser552)	137
5	13	1	DARPP-32	138
5	14	1	DARPP-32 (Phospho-Thr34)	139
5	15	1	eIF2A	140
5	16	1	eIF2A (Phospho-Ser51)	141
5	17	1	P70S6K	142
5	18	1	P70S6K (Phospho-Ser424)	143
5	19	1	P70S6K (Phospho-Thr421)	144
5	20	1	Synuclein alpha	145
5	21	1	Synuclein alpha (Phospho-Tyr136)	146
5	22	1	CaMK2A	147
5	23	1	CaMK2A (Phospho-Thr286)	148
5	24	1	CPI17 alpha	149
5	25	1	CPI17 alpha (Phospho-Thr38)	150
5	26	1	Gab1	151
5	27	1	Gab1 (Phospho-Tyr627)	152
5	28	1	NMDAR1 (Phospho-Ser897)	153
5	29	1	NMDAR2A/B (Phospho-Tyr1246/1252)	154
5	30	1	PKC delta	155
5	31	1	PKC delta (Phospho-Ser645)	156
5	32	1	PKC theta	157
5	1	2	BRCA1	126
5	2	2	BRCA1 (Phospho-Ser1423)	127
5	3	2	CDK1/CDC2	128
5	4	2	CDK1/CDC2 (Phospho-Tyr15)	129
5	5	2	p44/42 MAP Kinase	130
5	6	2	p44/42 MAP Kinase (Phospho-Tyr204)	131
5	7	2	SAPK/JNK	132
5	8	2	SAPK/JNK (Phospho-Tyr185)	133
5	9	2	P38 MAPK	134
5	10	2	P38 MAPK (Phospho-Thr180/Tyr182)	135
5	11	2	RelB	136
5	12	2	RelB (Phospho-Ser552)	137
5	13	2	DARPP-32	138
5	14	2	DARPP-32 (Phospho-Thr34)	139
5	15	2	eIF2A	140
5	16	2	eIF2A (Phospho-Ser51)	141
5	17	2	P70S6K	142
5	18	2	P70S6K (Phospho-Ser424)	143
5	19	2	P70S6K (Phospho-Thr421)	144
5	20	2	Synuclein alpha	145
5	21	2	Synuclein alpha (Phospho-Tyr136)	146
5	22	2	CaMK2A	147
5	23	2	CaMK2A (Phospho-Thr286)	148
5	24	2	CPI17 alpha	149
5	25	2	CPI17 alpha (Phospho-Thr38)	150
5	26	2	Gab1	151
5	27	2	Gab1 (Phospho-Tyr627)	152
5	28	2	NMDAR1 (Phospho-Ser897)	153
5	29	2	NMDAR2A/B (Phospho-Tyr1246/1252)	154
5	30	2	PKC delta	155
5	31	2	PKC delta (Phospho-Ser645)	156
5	32	2	PKC theta	157
5	1	3	BRCA1	126
5	2	3	BRCA1 (Phospho-Ser1423)	127
5	3	3	CDK1/CDC2	128
5	4	3	CDK1/CDC2 (Phospho-Tyr15)	129
5	5	3	p44/42 MAP Kinase	130
5	6	3	p44/42 MAP Kinase (Phospho-Tyr204)	131
5	7	3	SAPK/JNK	132
5	8	3	SAPK/JNK (Phospho-Tyr185)	133
5	9	3	P38 MAPK	134
5	10	3	P38 MAPK (Phospho-Thr180/Tyr182)	135
5	11	3	RelB	136
5	12	3	RelB (Phospho-Ser552)	137
5	13	3	DARPP-32	138
5	14	3	DARPP-32 (Phospho-Thr34)	139
5	15	3	eIF2A	140
5	16	3	eIF2A (Phospho-Ser51)	141
5	17	3	P70S6K	142
5	18	3	P70S6K (Phospho-Ser424)	143
5	19	3	P70S6K (Phospho-Thr421)	144
5	20	3	Synuclein alpha	145
5	21	3	Synuclein alpha (Phospho-Tyr136)	146
5	22	3	CaMK2A	147
5	23	3	CaMK2A (Phospho-Thr286)	148
5	24	3	CPI17 alpha	149
5	25	3	CPI17 alpha (Phospho-Thr38)	150
5	26	3	Gab1	151
5	27	3	Gab1 (Phospho-Tyr627)	152
5	28	3	NMDAR1 (Phospho-Ser897)	153
5	29	3	NMDAR2A/B (Phospho-Tyr1246/1252)	154
5	30	3	PKC delta	155
5	31	3	PKC delta (Phospho-Ser645)	156
5	32	3	PKC theta	157
5	1	4	BRCA1	126
5	2	4	BRCA1 (Phospho-Ser1423)	127
5	3	4	CDK1/CDC2	128
5	4	4	CDK1/CDC2 (Phospho-Tyr15)	129
5	5	4	p44/42 MAP Kinase	130
5	6	4	p44/42 MAP Kinase (Phospho-Tyr204)	131
5	7	4	SAPK/JNK	132
5	8	4	SAPK/JNK (Phospho-Tyr185)	133
5	9	4	P38 MAPK	134
5	10	4	P38 MAPK (Phospho-Thr180/Tyr182)	135
5	11	4	RelB	136
5	12	4	RelB (Phospho-Ser552)	137
5	13	4	DARPP-32	138
5	14	4	DARPP-32 (Phospho-Thr34)	139
5	15	4	eIF2A	140
5	16	4	eIF2A (Phospho-Ser51)	141
5	17	4	P70S6K	142
5	18	4	P70S6K (Phospho-Ser424)	143
5	19	4	P70S6K (Phospho-Thr421)	144
5	20	4	Synuclein alpha	145
5	21	4	Synuclein alpha (Phospho-Tyr136)	146
5	22	4	CaMK2A	147
5	23	4	CaMK2A (Phospho-Thr286)	148
5	24	4	CPI17 alpha	149
5	25	4	CPI17 alpha (Phospho-Thr38)	150
5	26	4	Gab1	151
5	27	4	Gab1 (Phospho-Tyr627)	152
5	28	4	NMDAR1 (Phospho-Ser897)	153
5	29	4	NMDAR2A/B (Phospho-Tyr1246/1252)	154
5	30	4	PKC delta	155
5	31	4	PKC delta (Phospho-Ser645)	156
5	32	4	PKC theta	157
5	1	5	BRCA1	126
5	2	5	BRCA1 (Phospho-Ser1423)	127
5	3	5	CDK1/CDC2	128
5	4	5	CDK1/CDC2 (Phospho-Tyr15)	129
5	5	5	p44/42 MAP Kinase	130
5	6	5	p44/42 MAP Kinase (Phospho-Tyr204)	131
5	7	5	SAPK/JNK	132
5	8	5	SAPK/JNK (Phospho-Tyr185)	133
5	9	5	P38 MAPK	134
5	10	5	P38 MAPK (Phospho-Thr180/Tyr182)	135
5	11	5	RelB	136
5	12	5	RelB (Phospho-Ser552)	137
5	13	5	DARPP-32	138
5	14	5	DARPP-32 (Phospho-Thr34)	139
5	15	5	eIF2A	140
5	16	5	eIF2A (Phospho-Ser51)	141
5	17	5	P70S6K	142
5	18	5	P70S6K (Phospho-Ser424)	143
5	19	5	P70S6K (Phospho-Thr421)	144
5	20	5	Synuclein alpha	145
5	21	5	Synuclein alpha (Phospho-Tyr136)	146
5	22	5	CaMK2A	147
5	23	5	CaMK2A (Phospho-Thr286)	148
5	24	5	CPI17 alpha	149
5	25	5	CPI17 alpha (Phospho-Thr38)	150
5	26	5	Gab1	151
5	27	5	Gab1 (Phospho-Tyr627)	152
5	28	5	NMDAR1 (Phospho-Ser897)	153
5	29	5	NMDAR2A/B (Phospho-Tyr1246/1252)	154
5	30	5	PKC delta	155
5	31	5	PKC delta (Phospho-Ser645)	156
5	32	5	PKC theta	157
5	1	6	BRCA1	126
5	2	6	BRCA1 (Phospho-Ser1423)	127
5	3	6	CDK1/CDC2	128
5	4	6	CDK1/CDC2 (Phospho-Tyr15)	129
5	5	6	p44/42 MAP Kinase	130
5	6	6	p44/42 MAP Kinase (Phospho-Tyr204)	131
5	7	6	SAPK/JNK	132
5	8	6	SAPK/JNK (Phospho-Tyr185)	133
5	9	6	P38 MAPK	134
5	10	6	P38 MAPK (Phospho-Thr180/Tyr182)	135
5	11	6	RelB	136
5	12	6	RelB (Phospho-Ser552)	137
5	13	6	DARPP-32	138
5	14	6	DARPP-32 (Phospho-Thr34)	139
5	15	6	eIF2A	140
5	16	6	eIF2A (Phospho-Ser51)	141
5	17	6	P70S6K	142
5	18	6	P70S6K (Phospho-Ser424)	143
5	19	6	P70S6K (Phospho-Thr421)	144
5	20	6	Synuclein alpha	145
5	21	6	Synuclein alpha (Phospho-Tyr136)	146
5	22	6	CaMK2A	147
5	23	6	CaMK2A (Phospho-Thr286)	148
5	24	6	CPI17 alpha	149
5	25	6	CPI17 alpha (Phospho-Thr38)	150
5	26	6	Gab1	151
5	27	6	Gab1 (Phospho-Tyr627)	152
5	28	6	NMDAR1 (Phospho-Ser897)	153
5	29	6	NMDAR2A/B (Phospho-Tyr1246/1252)	154
5	30	6	PKC delta	155
5	31	6	PKC delta (Phospho-Ser645)	156
5	32	6	PKC theta	157
6	1	1	PKC theta (Phospho-Thr538)	158
6	2	1	HSP90B	159
6	3	1	HSP90B (Phospho-Ser226)	160
6	4	1	IkB-epsilon	161
6	5	1	IkB-epsilon (Phospho-Ser22)	162
6	6	1	Myc	163
6	7	1	Myc (Phospho-Ser62)	164
6	8	1	Shc	165
6	9	1	Shc (Phospho-Tyr349)	166
6	10	1	SHP-2	167
6	11	1	SHP-2 (Phospho-Tyr542)	168
6	12	1	Trk B	169
6	13	1	Trk B (Phospho-Tyr515)	170
6	14	1	CrkII	171
6	15	1	CrkII (Phospho-Tyr221)	172
6	16	1	eEF2K	173
6	17	1	eEF2K (Phospho-Ser366)	174
6	18	1	STAT5B	175
6	19	1	STAT5B (Phospho-Ser731)	176
6	20	1	SYK	177
6	21	1	SYK (Phospho-Tyr348)	178
6	22	1	ACC1	179
6	23	1	ACC1 (Phospho-Ser80)	180
6	24	1	Caspase 8	181
6	25	1	Caspase 8	182
6	26	1	Caspase 8 (Phospho-Ser347)	183
6	27	1	EEF2	184
6	28	1	EEF2 (Phospho-Thr56)	185
6	29	1	SRF	186
6	30	1	SRF (Phospho-Ser99)	187
6	31	1	STAT2	188
6	32	1	STAT2 (Phospho-Tyr690)	189
6	1	2	PKC theta (Phospho-Thr538)	158
6	2	2	HSP90B	159
6	3	2	HSP90B (Phospho-Ser226)	160
6	4	2	IkB-epsilon	161
6	5	2	IkB-epsilon (Phospho-Ser22)	162
6	6	2	Myc	163
6	7	2	Myc (Phospho-Ser62)	164
6	8	2	Shc	165
6	9	2	Shc (Phospho-Tyr349)	166
6	10	2	SHP-2	167
6	11	2	SHP-2 (Phospho-Tyr542)	168
6	12	2	Trk B	169
6	13	2	Trk B (Phospho-Tyr515)	170
6	14	2	CrkII	171
6	15	2	CrkII (Phospho-Tyr221)	172
6	16	2	eEF2K	173
6	17	2	eEF2K (Phospho-Ser366)	174
6	18	2	STAT5B	175
6	19	2	STAT5B (Phospho-Ser731)	176
6	20	2	SYK	177
6	21	2	SYK (Phospho-Tyr348)	178
6	22	2	ACC1	179
6	23	2	ACC1 (Phospho-Ser80)	180
6	24	2	Caspase 8	181
6	25	2	Caspase 8	182
6	26	2	Caspase 8 (Phospho-Ser347)	183
6	27	2	EEF2	184
6	28	2	EEF2 (Phospho-Thr56)	185
6	29	2	SRF	186
6	30	2	SRF (Phospho-Ser99)	187
6	31	2	STAT2	188
6	32	2	STAT2 (Phospho-Tyr690)	189
6	1	3	PKC theta (Phospho-Thr538)	158
6	2	3	HSP90B	159
6	3	3	HSP90B (Phospho-Ser226)	160
6	4	3	IkB-epsilon	161
6	5	3	IkB-epsilon (Phospho-Ser22)	162
6	6	3	Myc	163
6	7	3	Myc (Phospho-Ser62)	164
6	8	3	Shc	165
6	9	3	Shc (Phospho-Tyr349)	166
6	10	3	SHP-2	167
6	11	3	SHP-2 (Phospho-Tyr542)	168
6	12	3	Trk B	169
6	13	3	Trk B (Phospho-Tyr515)	170
6	14	3	CrkII	171
6	15	3	CrkII (Phospho-Tyr221)	172
6	16	3	eEF2K	173
6	17	3	eEF2K (Phospho-Ser366)	174
6	18	3	STAT5B	175
6	19	3	STAT5B (Phospho-Ser731)	176
6	20	3	SYK	177
6	21	3	SYK (Phospho-Tyr348)	178
6	22	3	ACC1	179
6	23	3	ACC1 (Phospho-Ser80)	180
6	24	3	Caspase 8	181
6	25	3	Caspase 8	182
6	26	3	Caspase 8 (Phospho-Ser347)	183
6	27	3	EEF2	184
6	28	3	EEF2 (Phospho-Thr56)	185
6	29	3	SRF	186
6	30	3	SRF (Phospho-Ser99)	187
6	31	3	STAT2	188
6	32	3	STAT2 (Phospho-Tyr690)	189
6	1	4	PKC theta (Phospho-Thr538)	158
6	2	4	HSP90B	159
6	3	4	HSP90B (Phospho-Ser226)	160
6	4	4	IkB-epsilon	161
6	5	4	IkB-epsilon (Phospho-Ser22)	162
6	6	4	Myc	163
6	7	4	Myc (Phospho-Ser62)	164
6	8	4	Shc	165
6	9	4	Shc (Phospho-Tyr349)	166
6	10	4	SHP-2	167
6	11	4	SHP-2 (Phospho-Tyr542)	168
6	12	4	Trk B	169
6	13	4	Trk B (Phospho-Tyr515)	170
6	14	4	CrkII	171
6	15	4	CrkII (Phospho-Tyr221)	172
6	16	4	eEF2K	173
6	17	4	eEF2K (Phospho-Ser366)	174
6	18	4	STAT5B	175
6	19	4	STAT5B (Phospho-Ser731)	176
6	20	4	SYK	177
6	21	4	SYK (Phospho-Tyr348)	178
6	22	4	ACC1	179
6	23	4	ACC1 (Phospho-Ser80)	180
6	24	4	Caspase 8	181
6	25	4	Caspase 8	182
6	26	4	Caspase 8 (Phospho-Ser347)	183
6	27	4	EEF2	184
6	28	4	EEF2 (Phospho-Thr56)	185
6	29	4	SRF	186
6	30	4	SRF (Phospho-Ser99)	187
6	31	4	STAT2	188
6	32	4	STAT2 (Phospho-Tyr690)	189
6	1	5	PKC theta (Phospho-Thr538)	158
6	2	5	HSP90B	159
6	3	5	HSP90B (Phospho-Ser226)	160
6	4	5	IkB-epsilon	161
6	5	5	IkB-epsilon (Phospho-Ser22)	162
6	6	5	Myc	163
6	7	5	Myc (Phospho-Ser62)	164
6	8	5	Shc	165
6	9	5	Shc (Phospho-Tyr349)	166
6	10	5	SHP-2	167
6	11	5	SHP-2 (Phospho-Tyr542)	168
6	12	5	Trk B	169
6	13	5	Trk B (Phospho-Tyr515)	170
6	14	5	CrkII	171
6	15	5	CrkII (Phospho-Tyr221)	172
6	16	5	eEF2K	173
6	17	5	eEF2K (Phospho-Ser366)	174
6	18	5	STAT5B	175
6	19	5	STAT5B (Phospho-Ser731)	176
6	20	5	SYK	177
6	21	5	SYK (Phospho-Tyr348)	178
6	22	5	ACC1	179
6	23	5	ACC1 (Phospho-Ser80)	180
6	24	5	Caspase 8	181
6	25	5	Caspase 8	182
6	26	5	Caspase 8 (Phospho-Ser347)	183
6	27	5	EEF2	184
6	28	5	EEF2 (Phospho-Thr56)	185
6	29	5	SRF	186
6	30	5	SRF (Phospho-Ser99)	187
6	31	5	STAT2	188
6	32	5	STAT2 (Phospho-Tyr690)	189
6	1	6	PKC theta (Phospho-Thr538)	158
6	2	6	HSP90B	159
6	3	6	HSP90B (Phospho-Ser226)	160
6	4	6	IkB-epsilon	161
6	5	6	IkB-epsilon (Phospho-Ser22)	162
6	6	6	Myc	163
6	7	6	Myc (Phospho-Ser62)	164
6	8	6	Shc	165
6	9	6	Shc (Phospho-Tyr349)	166
6	10	6	SHP-2	167
6	11	6	SHP-2 (Phospho-Tyr542)	168
6	12	6	Trk B	169
6	13	6	Trk B (Phospho-Tyr515)	170
6	14	6	CrkII	171
6	15	6	CrkII (Phospho-Tyr221)	172
6	16	6	eEF2K	173
6	17	6	eEF2K (Phospho-Ser366)	174
6	18	6	STAT5B	175
6	19	6	STAT5B (Phospho-Ser731)	176
6	20	6	SYK	177
6	21	6	SYK (Phospho-Tyr348)	178
6	22	6	ACC1	179
6	23	6	ACC1 (Phospho-Ser80)	180
6	24	6	Caspase 8	181
6	25	6	Caspase 8	182
6	26	6	Caspase 8 (Phospho-Ser347)	183
6	27	6	EEF2	184
6	28	6	EEF2 (Phospho-Thr56)	185
6	29	6	SRF	186
6	30	6	SRF (Phospho-Ser99)	187
6	31	6	STAT2	188
6	32	6	STAT2 (Phospho-Tyr690)	189
7	1	1	AMPKbeta1	190
7	2	1	AMPKbeta1 (Phospho-Ser182)	191
7	3	1	Cyclin D1	192
7	4	1	Cyclin D1 (Phospho-Thr286)	193
7	5	1	IKK alpha/beta	194
7	6	1	IKK alpha/beta (Phospho-Ser180/181)	195
7	7	1	IKK-beta	196
7	8	1	IKK-beta (Phospho-Tyr188)	197
7	9	1	IKK-beta (Phospho-Tyr199)	198
7	10	1	IKK-gamma	199
7	11	1	IKK-gamma (Phospho-Ser31)	200
7	12	1	AKT1S1	201
7	13	1	AKT1S1 (Phospho-Thr246)	202
7	14	1	BID	203
7	15	1	BID (Phospho-Ser78)	204
7	16	1	FOXO1/3/4-pan	205
7	17	1	FOXO1/3/4-pan (Phospho-Thr24/32)	206
7	18	1	GRK2	207
7	19	1	GRK2 (Phospho-Ser29)	208
7	20	1	MDM2	209
7	21	1	MDM2 (Phospho-Ser166)	210
7	22	1	P90RSK	211
7	23	1	P90RSK (Phospho-Thr359/Ser363)	212
7	24	1	PP2A-alpha	213
7	25	1	PP2A-alpha (Phospho-Tyr307)	214
7	26	1	Tuberin/TSC2	215
7	27	1	Tuberin/TSC2 (Phospho-Thr1462)	216
7	28	1	Cyclin E1	217
7	29	1	Cyclin E1 (Phospho-Thr77)	218
7	30	1	LKB1	219
7	31	1	LKB1 (Phospho-Thr189)	220
7	32	1	Ras-GRF1	221
7	1	2	AMPKbeta1	190
7	2	2	AMPKbeta1 (Phospho-Ser182)	191
7	3	2	Cyclin D1	192
7	4	2	Cyclin D1 (Phospho-Thr286)	193
7	5	2	IKK alpha/beta	194
7	6	2	IKK alpha/beta (Phospho-Ser180/181)	195
7	7	2	IKK-beta	196
7	8	2	IKK-beta (Phospho-Tyr188)	197
7	9	2	IKK-beta (Phospho-Tyr199)	198
7	10	2	IKK-gamma	199
7	11	2	IKK-gamma (Phospho-Ser31)	200
7	12	2	AKT1S1	201
7	13	2	AKT1S1 (Phospho-Thr246)	202
7	14	2	BID	203
7	15	2	BID (Phospho-Ser78)	204
7	16	2	FOXO1/3/4-pan	205
7	17	2	FOXO1/3/4-pan (Phospho-Thr24/32)	206
7	18	2	GRK2	207
7	19	2	GRK2 (Phospho-Ser29)	208
7	20	2	MDM2	209
7	21	2	MDM2 (Phospho-Ser166)	210
7	22	2	P90RSK	211
7	23	2	P90RSK (Phospho-Thr359/Ser363)	212
7	24	2	PP2A-alpha	213
7	25	2	PP2A-alpha (Phospho-Tyr307)	214
7	26	2	Tuberin/TSC2	215
7	27	2	Tuberin/TSC2 (Phospho-Thr1462)	216
7	28	2	Cyclin E1	217
7	29	2	Cyclin E1 (Phospho-Thr77)	218
7	30	2	LKB1	219
7	31	2	LKB1 (Phospho-Thr189)	220
7	32	2	Ras-GRF1	221
7	1	3	AMPKbeta1	190
7	2	3	AMPKbeta1 (Phospho-Ser182)	191
7	3	3	Cyclin D1	192
7	4	3	Cyclin D1 (Phospho-Thr286)	193
7	5	3	IKK alpha/beta	194
7	6	3	IKK alpha/beta (Phospho-Ser180/181)	195
7	7	3	IKK-beta	196
7	8	3	IKK-beta (Phospho-Tyr188)	197
7	9	3	IKK-beta (Phospho-Tyr199)	198
7	10	3	IKK-gamma	199
7	11	3	IKK-gamma (Phospho-Ser31)	200
7	12	3	AKT1S1	201
7	13	3	AKT1S1 (Phospho-Thr246)	202
7	14	3	BID	203
7	15	3	BID (Phospho-Ser78)	204
7	16	3	FOXO1/3/4-pan	205
7	17	3	FOXO1/3/4-pan (Phospho-Thr24/32)	206
7	18	3	GRK2	207
7	19	3	GRK2 (Phospho-Ser29)	208
7	20	3	MDM2	209
7	21	3	MDM2 (Phospho-Ser166)	210
7	22	3	P90RSK	211
7	23	3	P90RSK (Phospho-Thr359/Ser363)	212
7	24	3	PP2A-alpha	213
7	25	3	PP2A-alpha (Phospho-Tyr307)	214
7	26	3	Tuberin/TSC2	215
7	27	3	Tuberin/TSC2 (Phospho-Thr1462)	216
7	28	3	Cyclin E1	217
7	29	3	Cyclin E1 (Phospho-Thr77)	218
7	30	3	LKB1	219
7	31	3	LKB1 (Phospho-Thr189)	220
7	32	3	Ras-GRF1	221
7	1	4	AMPKbeta1	190
7	2	4	AMPKbeta1 (Phospho-Ser182)	191
7	3	4	Cyclin D1	192
7	4	4	Cyclin D1 (Phospho-Thr286)	193
7	5	4	IKK alpha/beta	194
7	6	4	IKK alpha/beta (Phospho-Ser180/181)	195
7	7	4	IKK-beta	196
7	8	4	IKK-beta (Phospho-Tyr188)	197
7	9	4	IKK-beta (Phospho-Tyr199)	198
7	10	4	IKK-gamma	199
7	11	4	IKK-gamma (Phospho-Ser31)	200
7	12	4	AKT1S1	201
7	13	4	AKT1S1 (Phospho-Thr246)	202
7	14	4	BID	203
7	15	4	BID (Phospho-Ser78)	204
7	16	4	FOXO1/3/4-pan	205
7	17	4	FOXO1/3/4-pan (Phospho-Thr24/32)	206
7	18	4	GRK2	207
7	19	4	GRK2 (Phospho-Ser29)	208
7	20	4	MDM2	209
7	21	4	MDM2 (Phospho-Ser166)	210
7	22	4	P90RSK	211
7	23	4	P90RSK (Phospho-Thr359/Ser363)	212
7	24	4	PP2A-alpha	213
7	25	4	PP2A-alpha (Phospho-Tyr307)	214
7	26	4	Tuberin/TSC2	215
7	27	4	Tuberin/TSC2 (Phospho-Thr1462)	216
7	28	4	Cyclin E1	217
7	29	4	Cyclin E1 (Phospho-Thr77)	218
7	30	4	LKB1	219
7	31	4	LKB1 (Phospho-Thr189)	220
7	32	4	Ras-GRF1	221
7	1	5	AMPKbeta1	190
7	2	5	AMPKbeta1 (Phospho-Ser182)	191
7	3	5	Cyclin D1	192
7	4	5	Cyclin D1 (Phospho-Thr286)	193
7	5	5	IKK alpha/beta	194
7	6	5	IKK alpha/beta (Phospho-Ser180/181)	195
7	7	5	IKK-beta	196
7	8	5	IKK-beta (Phospho-Tyr188)	197
7	9	5	IKK-beta (Phospho-Tyr199)	198
7	10	5	IKK-gamma	199
7	11	5	IKK-gamma (Phospho-Ser31)	200
7	12	5	AKT1S1	201
7	13	5	AKT1S1 (Phospho-Thr246)	202
7	14	5	BID	203
7	15	5	BID (Phospho-Ser78)	204
7	16	5	FOXO1/3/4-pan	205
7	17	5	FOXO1/3/4-pan (Phospho-Thr24/32)	206
7	18	5	GRK2	207
7	19	5	GRK2 (Phospho-Ser29)	208
7	20	5	MDM2	209
7	21	5	MDM2 (Phospho-Ser166)	210
7	22	5	P90RSK	211
7	23	5	P90RSK (Phospho-Thr359/Ser363)	212
7	24	5	PP2A-alpha	213
7	25	5	PP2A-alpha (Phospho-Tyr307)	214
7	26	5	Tuberin/TSC2	215
7	27	5	Tuberin/TSC2 (Phospho-Thr1462)	216
7	28	5	Cyclin E1	217
7	29	5	Cyclin E1 (Phospho-Thr77)	218
7	30	5	LKB1	219
7	31	5	LKB1 (Phospho-Thr189)	220
7	32	5	Ras-GRF1	221
7	1	6	AMPKbeta1	190
7	2	6	AMPKbeta1 (Phospho-Ser182)	191
7	3	6	Cyclin D1	192
7	4	6	Cyclin D1 (Phospho-Thr286)	193
7	5	6	IKK alpha/beta	194
7	6	6	IKK alpha/beta (Phospho-Ser180/181)	195
7	7	6	IKK-beta	196
7	8	6	IKK-beta (Phospho-Tyr188)	197
7	9	6	IKK-beta (Phospho-Tyr199)	198
7	10	6	IKK-gamma	199
7	11	6	IKK-gamma (Phospho-Ser31)	200
7	12	6	AKT1S1	201
7	13	6	AKT1S1 (Phospho-Thr246)	202
7	14	6	BID	203
7	15	6	BID (Phospho-Ser78)	204
7	16	6	FOXO1/3/4-pan	205
7	17	6	FOXO1/3/4-pan (Phospho-Thr24/32)	206
7	18	6	GRK2	207
7	19	6	GRK2 (Phospho-Ser29)	208
7	20	6	MDM2	209
7	21	6	MDM2 (Phospho-Ser166)	210
7	22	6	P90RSK	211
7	23	6	P90RSK (Phospho-Thr359/Ser363)	212
7	24	6	PP2A-alpha	213
7	25	6	PP2A-alpha (Phospho-Tyr307)	214
7	26	6	Tuberin/TSC2	215
7	27	6	Tuberin/TSC2 (Phospho-Thr1462)	216
7	28	6	Cyclin E1	217
7	29	6	Cyclin E1 (Phospho-Thr77)	218
7	30	6	LKB1	219
7	31	6	LKB1 (Phospho-Thr189)	220
7	32	6	Ras-GRF1	221
8	1	1	Ras-GRF1 (Phospho-Ser916)	222
8	2	1	14-3-3 theta/tau (Phospho-Ser232)	223
8	3	1	14-3-3 zeta/delta	224
8	4	1	Actin Pan	225
8	5	1	Actin Pan (a/b/g)(Phospho-Tyr55/53)	226
8	6	1	HDAC1	227
8	7	1	HDAC1 (Phospho-Ser421)	228
8	8	1	Calmodulin	229
8	9	1	Calmodulin (Phospho-Thr79/Ser81)	230
8	10	1	Caspase 9	231
8	11	1	Caspase 9 (Phospho-Ser196)	232
8	12	1	Catalase	233
8	13	1	Catalase (Phospho-Tyr385)	234
8	14	1	Chk1	235
8	15	1	Chk1 (Phospho-Ser286)	236
8	16	1	FAK	237
8	17	1	FAK (Phospho-Ser910)	238
8	18	1	Smad1	239
8	19	1	Smad1 (Phospho-Ser187)	240
8	20	1	Smad2	241
8	21	1	Smad2 (Phospho-Ser467)	242
8	22	1	Smad2/3 (Phospho-Thr8)	243
8	23	1	Smad3	244
8	24	1	Smad3 (Phospho-Ser213)	245
8	25	1	Caspase 1	246
8	26	1	Caspase 1 (Phospho-Ser376)	247
8	27	1	MAP3K7/TAK1	248
8	28	1	MAP3K7/TAK1 (Phospho-Thr184)	249
8	29	1	eNOS	250
8	30	1	eNOS (Phospho-Ser615)	251
8	31	1	PI3-kinase p85-alpha (Phospho-Tyr607)	252
8	32	1	PI3-kinase p85-subunit alpha/gamma	253
8	1	2	Ras-GRF1 (Phospho-Ser916)	222
8	2	2	14-3-3 theta/tau (Phospho-Ser232)	223
8	3	2	14-3-3 zeta/delta	224
8	4	2	Actin Pan	225
8	5	2	Actin Pan (a/b/g)(Phospho-Tyr55/53)	226
8	6	2	HDAC1	227
8	7	2	HDAC1 (Phospho-Ser421)	228
8	8	2	Calmodulin	229
8	9	2	Calmodulin (Phospho-Thr79/Ser81)	230
8	10	2	Caspase 9	231
8	11	2	Caspase 9 (Phospho-Ser196)	232
8	12	2	Catalase	233
8	13	2	Catalase (Phospho-Tyr385)	234
8	14	2	Chk1	235
8	15	2	Chk1 (Phospho-Ser286)	236
8	16	2	FAK	237
8	17	2	FAK (Phospho-Ser910)	238
8	18	2	Smad1	239
8	19	2	Smad1 (Phospho-Ser187)	240
8	20	2	Smad2	241
8	21	2	Smad2 (Phospho-Ser467)	242
8	22	2	Smad2/3 (Phospho-Thr8)	243
8	23	2	Smad3	244
8	24	2	Smad3 (Phospho-Ser213)	245
8	25	2	Caspase 1	246
8	26	2	Caspase 1 (Phospho-Ser376)	247
8	27	2	MAP3K7/TAK1	248
8	28	2	MAP3K7/TAK1 (Phospho-Thr184)	249
8	29	2	eNOS	250
8	30	2	eNOS (Phospho-Ser615)	251
8	31	2	PI3-kinase p85-alpha (Phospho-Tyr607)	252
8	32	2	PI3-kinase p85-subunit alpha/gamma	253
8	1	3	Ras-GRF1 (Phospho-Ser916)	222
8	2	3	14-3-3 theta/tau (Phospho-Ser232)	223
8	3	3	14-3-3 zeta/delta	224
8	4	3	Actin Pan	225
8	5	3	Actin Pan (a/b/g)(Phospho-Tyr55/53)	226
8	6	3	HDAC1	227
8	7	3	HDAC1 (Phospho-Ser421)	228
8	8	3	Calmodulin	229
8	9	3	Calmodulin (Phospho-Thr79/Ser81)	230
8	10	3	Caspase 9	231
8	11	3	Caspase 9 (Phospho-Ser196)	232
8	12	3	Catalase	233
8	13	3	Catalase (Phospho-Tyr385)	234
8	14	3	Chk1	235
8	15	3	Chk1 (Phospho-Ser286)	236
8	16	3	FAK	237
8	17	3	FAK (Phospho-Ser910)	238
8	18	3	Smad1	239
8	19	3	Smad1 (Phospho-Ser187)	240
8	20	3	Smad2	241
8	21	3	Smad2 (Phospho-Ser467)	242
8	22	3	Smad2/3 (Phospho-Thr8)	243
8	23	3	Smad3	244
8	24	3	Smad3 (Phospho-Ser213)	245
8	25	3	Caspase 1	246
8	26	3	Caspase 1 (Phospho-Ser376)	247
8	27	3	MAP3K7/TAK1	248
8	28	3	MAP3K7/TAK1 (Phospho-Thr184)	249
8	29	3	eNOS	250
8	30	3	eNOS (Phospho-Ser615)	251
8	31	3	PI3-kinase p85-alpha (Phospho-Tyr607)	252
8	32	3	PI3-kinase p85-subunit alpha/gamma	253
8	1	4	Ras-GRF1 (Phospho-Ser916)	222
8	2	4	14-3-3 theta/tau (Phospho-Ser232)	223
8	3	4	14-3-3 zeta/delta	224
8	4	4	Actin Pan	225
8	5	4	Actin Pan (a/b/g)(Phospho-Tyr55/53)	226
8	6	4	HDAC1	227
8	7	4	HDAC1 (Phospho-Ser421)	228
8	8	4	Calmodulin	229
8	9	4	Calmodulin (Phospho-Thr79/Ser81)	230
8	10	4	Caspase 9	231
8	11	4	Caspase 9 (Phospho-Ser196)	232
8	12	4	Catalase	233
8	13	4	Catalase (Phospho-Tyr385)	234
8	14	4	Chk1	235
8	15	4	Chk1 (Phospho-Ser286)	236
8	16	4	FAK	237
8	17	4	FAK (Phospho-Ser910)	238
8	18	4	Smad1	239
8	19	4	Smad1 (Phospho-Ser187)	240
8	20	4	Smad2	241
8	21	4	Smad2 (Phospho-Ser467)	242
8	22	4	Smad2/3 (Phospho-Thr8)	243
8	23	4	Smad3	244
8	24	4	Smad3 (Phospho-Ser213)	245
8	25	4	Caspase 1	246
8	26	4	Caspase 1 (Phospho-Ser376)	247
8	27	4	MAP3K7/TAK1	248
8	28	4	MAP3K7/TAK1 (Phospho-Thr184)	249
8	29	4	eNOS	250
8	30	4	eNOS (Phospho-Ser615)	251
8	31	4	PI3-kinase p85-alpha (Phospho-Tyr607)	252
8	32	4	PI3-kinase p85-subunit alpha/gamma	253
8	1	5	Ras-GRF1 (Phospho-Ser916)	222
8	2	5	14-3-3 theta/tau (Phospho-Ser232)	223
8	3	5	14-3-3 zeta/delta	224
8	4	5	Actin Pan	225
8	5	5	Actin Pan (a/b/g)(Phospho-Tyr55/53)	226
8	6	5	HDAC1	227
8	7	5	HDAC1 (Phospho-Ser421)	228
8	8	5	Calmodulin	229
8	9	5	Calmodulin (Phospho-Thr79/Ser81)	230
8	10	5	Caspase 9	231
8	11	5	Caspase 9 (Phospho-Ser196)	232
8	12	5	Catalase	233
8	13	5	Catalase (Phospho-Tyr385)	234
8	14	5	Chk1	235
8	15	5	Chk1 (Phospho-Ser286)	236
8	16	5	FAK	237
8	17	5	FAK (Phospho-Ser910)	238
8	18	5	Smad1	239
8	19	5	Smad1 (Phospho-Ser187)	240
8	20	5	Smad2	241
8	21	5	Smad2 (Phospho-Ser467)	242
8	22	5	Smad2/3 (Phospho-Thr8)	243
8	23	5	Smad3	244
8	24	5	Smad3 (Phospho-Ser213)	245
8	25	5	Caspase 1	246
8	26	5	Caspase 1 (Phospho-Ser376)	247
8	27	5	MAP3K7/TAK1	248
8	28	5	MAP3K7/TAK1 (Phospho-Thr184)	249
8	29	5	eNOS	250
8	30	5	eNOS (Phospho-Ser615)	251
8	31	5	PI3-kinase p85-alpha (Phospho-Tyr607)	252
8	32	5	PI3-kinase p85-subunit alpha/gamma	253
8	1	6	Ras-GRF1 (Phospho-Ser916)	222
8	2	6	14-3-3 theta/tau (Phospho-Ser232)	223
8	3	6	14-3-3 zeta/delta	224
8	4	6	Actin Pan	225
8	5	6	Actin Pan (a/b/g)(Phospho-Tyr55/53)	226
8	6	6	HDAC1	227
8	7	6	HDAC1 (Phospho-Ser421)	228
8	8	6	Calmodulin	229
8	9	6	Calmodulin (Phospho-Thr79/Ser81)	230
8	10	6	Caspase 9	231
8	11	6	Caspase 9 (Phospho-Ser196)	232
8	12	6	Catalase	233
8	13	6	Catalase (Phospho-Tyr385)	234
8	14	6	Chk1	235
8	15	6	Chk1 (Phospho-Ser286)	236
8	16	6	FAK	237
8	17	6	FAK (Phospho-Ser910)	238
8	18	6	Smad1	239
8	19	6	Smad1 (Phospho-Ser187)	240
8	20	6	Smad2	241
8	21	6	Smad2 (Phospho-Ser467)	242
8	22	6	Smad2/3 (Phospho-Thr8)	243
8	23	6	Smad3	244
8	24	6	Smad3 (Phospho-Ser213)	245
8	25	6	Caspase 1	246
8	26	6	Caspase 1 (Phospho-Ser376)	247
8	27	6	MAP3K7/TAK1	248
8	28	6	MAP3K7/TAK1 (Phospho-Thr184)	249
8	29	6	eNOS	250
8	30	6	eNOS (Phospho-Ser615)	251
8	31	6	PI3-kinase p85-alpha (Phospho-Tyr607)	252
8	32	6	PI3-kinase p85-subunit alpha/gamma	253
9	1	1	Abl1	254
9	2	1	Abl1 (Phospho-Thr754/735)	255
9	3	1	B-RAF	256
9	4	1	B-RAF (Phospho-Ser446)	257
9	5	1	CaMK2-beta/gamma/delta	258
9	6	1	CaMK2-beta/gamma/delta (Phospho-Thr287)	259
9	7	1	PAK1	260
9	8	1	PAK1 (Phospho-Ser204)	261
9	9	1	RSK1/2/3/4	262
9	10	1	RSK1/2/3/4 (Phospho-Ser221/227/218/232)	263
9	11	1	Gab2 (Phospho-Tyr643)	264
9	12	1	LYN	265
9	13	1	LYN (Phospho-Tyr507)	266
9	14	1	PLCG1	267
9	15	1	PLCG1 (Phospho-Tyr783)	268
9	16	1	CBL (Phospho-Tyr700)	269
9	17	1	FGFR1	270
9	18	1	FGFR1 (Phospho-Tyr654)	271
9	19	1	Lamin A/C	272
9	20	1	Lamin A/C (Phospho-Ser392)	273
9	21	1	MITF	274
9	22	1	MITF (Phospho-Ser73)	275
9	23	1	PPAR-gamma	276
9	24	1	PPAR-gamma (Phospho-Ser112)	277
9	25	1	PP1 alpha	278
9	26	1	PP1 alpha (Phospho-Thr320)	279
9	27	1	Interferon-alpha/beta receptor alpha chain	280
9	28	1	Interferon-gamma receptor alpha (Phospho-Tyr457)	281
9	29	1	PDGFR beta	282
9	30	1	PDGFR beta (Phospho-Tyr1021)	283
9	31	1	FADD (Phospho-Ser194)	284
9	32	1	BLNK	285
9	1	2	Abl1	254
9	2	2	Abl1 (Phospho-Thr754/735)	255
9	3	2	B-RAF	256
9	4	2	B-RAF (Phospho-Ser446)	257
9	5	2	CaMK2-beta/gamma/delta	258
9	6	2	CaMK2-beta/gamma/delta (Phospho-Thr287)	259
9	7	2	PAK1	260
9	8	2	PAK1 (Phospho-Ser204)	261
9	9	2	RSK1/2/3/4	262
9	10	2	RSK1/2/3/4 (Phospho-Ser221/227/218/232)	263
9	11	2	Gab2 (Phospho-Tyr643)	264
9	12	2	LYN	265
9	13	2	LYN (Phospho-Tyr507)	266
9	14	2	PLCG1	267
9	15	2	PLCG1 (Phospho-Tyr783)	268
9	16	2	CBL (Phospho-Tyr700)	269
9	17	2	FGFR1	270
9	18	2	FGFR1 (Phospho-Tyr654)	271
9	19	2	Lamin A/C	272
9	20	2	Lamin A/C (Phospho-Ser392)	273
9	21	2	MITF	274
9	22	2	MITF (Phospho-Ser73)	275
9	23	2	PPAR-gamma	276
9	24	2	PPAR-gamma (Phospho-Ser112)	277
9	25	2	PP1 alpha	278
9	26	2	PP1 alpha (Phospho-Thr320)	279
9	27	2	Interferon-alpha/beta receptor alpha chain	280
9	28	2	Interferon-gamma receptor alpha (Phospho-Tyr457)	281
9	29	2	PDGFR beta	282
9	30	2	PDGFR beta (Phospho-Tyr1021)	283
9	31	2	FADD (Phospho-Ser194)	284
9	32	2	BLNK	285
9	1	3	Abl1	254
9	2	3	Abl1 (Phospho-Thr754/735)	255
9	3	3	B-RAF	256
9	4	3	B-RAF (Phospho-Ser446)	257
9	5	3	CaMK2-beta/gamma/delta	258
9	6	3	CaMK2-beta/gamma/delta (Phospho-Thr287)	259
9	7	3	PAK1	260
9	8	3	PAK1 (Phospho-Ser204)	261
9	9	3	RSK1/2/3/4	262
9	10	3	RSK1/2/3/4 (Phospho-Ser221/227/218/232)	263
9	11	3	Gab2 (Phospho-Tyr643)	264
9	12	3	LYN	265
9	13	3	LYN (Phospho-Tyr507)	266
9	14	3	PLCG1	267
9	15	3	PLCG1 (Phospho-Tyr783)	268
9	16	3	CBL (Phospho-Tyr700)	269
9	17	3	FGFR1	270
9	18	3	FGFR1 (Phospho-Tyr654)	271
9	19	3	Lamin A/C	272
9	20	3	Lamin A/C (Phospho-Ser392)	273
9	21	3	MITF	274
9	22	3	MITF (Phospho-Ser73)	275
9	23	3	PPAR-gamma	276
9	24	3	PPAR-gamma (Phospho-Ser112)	277
9	25	3	PP1 alpha	278
9	26	3	PP1 alpha (Phospho-Thr320)	279
9	27	3	Interferon-alpha/beta receptor alpha chain	280
9	28	3	Interferon-gamma receptor alpha (Phospho-Tyr457)	281
9	29	3	PDGFR beta	282
9	30	3	PDGFR beta (Phospho-Tyr1021)	283
9	31	3	FADD (Phospho-Ser194)	284
9	32	3	BLNK	285
9	1	4	Abl1	254
9	2	4	Abl1 (Phospho-Thr754/735)	255
9	3	4	B-RAF	256
9	4	4	B-RAF (Phospho-Ser446)	257
9	5	4	CaMK2-beta/gamma/delta	258
9	6	4	CaMK2-beta/gamma/delta (Phospho-Thr287)	259
9	7	4	PAK1	260
9	8	4	PAK1 (Phospho-Ser204)	261
9	9	4	RSK1/2/3/4	262
9	10	4	RSK1/2/3/4 (Phospho-Ser221/227/218/232)	263
9	11	4	Gab2 (Phospho-Tyr643)	264
9	12	4	LYN	265
9	13	4	LYN (Phospho-Tyr507)	266
9	14	4	PLCG1	267
9	15	4	PLCG1 (Phospho-Tyr783)	268
9	16	4	CBL (Phospho-Tyr700)	269
9	17	4	FGFR1	270
9	18	4	FGFR1 (Phospho-Tyr654)	271
9	19	4	Lamin A/C	272
9	20	4	Lamin A/C (Phospho-Ser392)	273
9	21	4	MITF	274
9	22	4	MITF (Phospho-Ser73)	275
9	23	4	PPAR-gamma	276
9	24	4	PPAR-gamma (Phospho-Ser112)	277
9	25	4	PP1 alpha	278
9	26	4	PP1 alpha (Phospho-Thr320)	279
9	27	4	Interferon-alpha/beta receptor alpha chain	280
9	28	4	Interferon-gamma receptor alpha (Phospho-Tyr457)	281
9	29	4	PDGFR beta	282
9	30	4	PDGFR beta (Phospho-Tyr1021)	283
9	31	4	FADD (Phospho-Ser194)	284
9	32	4	BLNK	285
9	1	5	Abl1	254
9	2	5	Abl1 (Phospho-Thr754/735)	255
9	3	5	B-RAF	256
9	4	5	B-RAF (Phospho-Ser446)	257
9	5	5	CaMK2-beta/gamma/delta	258
9	6	5	CaMK2-beta/gamma/delta (Phospho-Thr287)	259
9	7	5	PAK1	260
9	8	5	PAK1 (Phospho-Ser204)	261
9	9	5	RSK1/2/3/4	262
9	10	5	RSK1/2/3/4 (Phospho-Ser221/227/218/232)	263
9	11	5	Gab2 (Phospho-Tyr643)	264
9	12	5	LYN	265
9	13	5	LYN (Phospho-Tyr507)	266
9	14	5	PLCG1	267
9	15	5	PLCG1 (Phospho-Tyr783)	268
9	16	5	CBL (Phospho-Tyr700)	269
9	17	5	FGFR1	270
9	18	5	FGFR1 (Phospho-Tyr654)	271
9	19	5	Lamin A/C	272
9	20	5	Lamin A/C (Phospho-Ser392)	273
9	21	5	MITF	274
9	22	5	MITF (Phospho-Ser73)	275
9	23	5	PPAR-gamma	276
9	24	5	PPAR-gamma (Phospho-Ser112)	277
9	25	5	PP1 alpha	278
9	26	5	PP1 alpha (Phospho-Thr320)	279
9	27	5	Interferon-alpha/beta receptor alpha chain	280
9	28	5	Interferon-gamma receptor alpha (Phospho-Tyr457)	281
9	29	5	PDGFR beta	282
9	30	5	PDGFR beta (Phospho-Tyr1021)	283
9	31	5	FADD (Phospho-Ser194)	284
9	32	5	BLNK	285
9	1	6	Abl1	254
9	2	6	Abl1 (Phospho-Thr754/735)	255
9	3	6	B-RAF	256
9	4	6	B-RAF (Phospho-Ser446)	257
9	5	6	CaMK2-beta/gamma/delta	258
9	6	6	CaMK2-beta/gamma/delta (Phospho-Thr287)	259
9	7	6	PAK1	260
9	8	6	PAK1 (Phospho-Ser204)	261
9	9	6	RSK1/2/3/4	262
9	10	6	RSK1/2/3/4 (Phospho-Ser221/227/218/232)	263
9	11	6	Gab2 (Phospho-Tyr643)	264
9	12	6	LYN	265
9	13	6	LYN (Phospho-Tyr507)	266
9	14	6	PLCG1	267
9	15	6	PLCG1 (Phospho-Tyr783)	268
9	16	6	CBL (Phospho-Tyr700)	269
9	17	6	FGFR1	270
9	18	6	FGFR1 (Phospho-Tyr654)	271
9	19	6	Lamin A/C	272
9	20	6	Lamin A/C (Phospho-Ser392)	273
9	21	6	MITF	274
9	22	6	MITF (Phospho-Ser73)	275
9	23	6	PPAR-gamma	276
9	24	6	PPAR-gamma (Phospho-Ser112)	277
9	25	6	PP1 alpha	278
9	26	6	PP1 alpha (Phospho-Thr320)	279
9	27	6	Interferon-alpha/beta receptor alpha chain	280
9	28	6	Interferon-gamma receptor alpha (Phospho-Tyr457)	281
9	29	6	PDGFR beta	282
9	30	6	PDGFR beta (Phospho-Tyr1021)	283
9	31	6	FADD (Phospho-Ser194)	284
9	32	6	BLNK	285
10	1	1	BLNK (Phospho-Tyr96)	286
10	2	1	IL-10R-alpha	287
10	3	1	IL-10R-alpha (Phospho-Tyr496)	288
10	4	1	IL-4R/CD124	289
10	5	1	IL-4R/CD124 (Phospho-Tyr497)	290
10	6	1	Bax	291
10	7	1	BAX (Phospho-Thr167)	292
10	8	1	PLK1	293
10	9	1	PLK1 (Phospho-Thr210)	294
10	10	1	TGFBR1	295
10	11	1	TGFBR2	296
10	12	1	Fos	297
10	13	1	SREBP-1	298
10	14	1	Caspase 3	299
10	15	1	Beclin-1	300
10	16	1	WNT1	301
10	17	1	VDAC1	302
10	18	1	COX41	303
10	19	1	Beta actin	304
10	20	1	Negative control	N
10	21	1	Negative control	N
10	22	1	Negative control	N
10	23	1	Negative control	N
10	24	1	Empty	E
10	25	1	Empty	E
10	26	1	Empty	E
10	27	1	Empty	E
10	28	1	Empty	E
10	29	1	Empty	E
10	30	1	Empty	E
10	31	1	Empty	E
10	32	1	Position Marker	P
10	1	2	BLNK (Phospho-Tyr96)	286
10	2	2	IL-10R-alpha	287
10	3	2	IL-10R-alpha (Phospho-Tyr496)	288
10	4	2	IL-4R/CD124	289
10	5	2	IL-4R/CD124 (Phospho-Tyr497)	290
10	6	2	Bax	291
10	7	2	BAX (Phospho-Thr167)	292
10	8	2	PLK1	293
10	9	2	PLK1 (Phospho-Thr210)	294
10	10	2	TGFBR1	295
10	11	2	TGFBR2	296
10	12	2	Fos	297
10	13	2	SREBP-1	298
10	14	2	Caspase 3	299
10	15	2	Beclin-1	300
10	16	2	WNT1	301
10	17	2	VDAC1	302
10	18	2	COX41	303
10	19	2	Beta actin	304
10	20	2	Negative control	N
10	21	2	Negative control	N
10	22	2	Negative control	N
10	23	2	Negative control	N
10	24	2	Empty	E
10	25	2	Empty	E
10	26	2	Empty	E
10	27	2	Empty	E
10	28	2	Empty	E
10	29	2	Empty	E
10	30	2	Empty	E
10	31	2	Empty	E
10	32	2	Position Marker	P
10	1	3	BLNK (Phospho-Tyr96)	286
10	2	3	IL-10R-alpha	287
10	3	3	IL-10R-alpha (Phospho-Tyr496)	288
10	4	3	IL-4R/CD124	289
10	5	3	IL-4R/CD124 (Phospho-Tyr497)	290
10	6	3	Bax	291
10	7	3	BAX (Phospho-Thr167)	292
10	8	3	PLK1	293
10	9	3	PLK1 (Phospho-Thr210)	294
10	10	3	TGFBR1	295
10	11	3	TGFBR2	296
10	12	3	Fos	297
10	13	3	SREBP-1	298
10	14	3	Caspase 3	299
10	15	3	Beclin-1	300
10	16	3	WNT1	301
10	17	3	VDAC1	302
10	18	3	COX41	303
10	19	3	Beta actin	304
10	20	3	Negative control	N
10	21	3	Negative control	N
10	22	3	Negative control	N
10	23	3	Negative control	N
10	24	3	Empty	E
10	25	3	Empty	E
10	26	3	Empty	E
10	27	3	Empty	E
10	28	3	Empty	E
10	29	3	Empty	E
10	30	3	Empty	E
10	31	3	Empty	E
10	32	3	Position Marker	P
10	1	4	BLNK (Phospho-Tyr96)	286
10	2	4	IL-10R-alpha	287
10	3	4	IL-10R-alpha (Phospho-Tyr496)	288
10	4	4	IL-4R/CD124	289
10	5	4	IL-4R/CD124 (Phospho-Tyr497)	290
10	6	4	Bax	291
10	7	4	BAX (Phospho-Thr167)	292
10	8	4	PLK1	293
10	9	4	PLK1 (Phospho-Thr210)	294
10	10	4	TGFBR1	295
10	11	4	TGFBR2	296
10	12	4	Fos	297
10	13	4	SREBP-1	298
10	14	4	Caspase 3	299
10	15	4	Beclin-1	300
10	16	4	WNT1	301
10	17	4	VDAC1	302
10	18	4	COX41	303
10	19	4	Beta actin	304
10	20	4	Negative control	N
10	21	4	Negative control	N
10	22	4	Negative control	N
10	23	4	Negative control	N
10	24	4	Empty	E
10	25	4	Empty	E
10	26	4	Empty	E
10	27	4	Empty	E
10	28	4	Empty	E
10	29	4	Empty	E
10	30	4	Empty	E
10	31	4	Empty	E
10	32	4	Position Marker	P
10	1	5	BLNK (Phospho-Tyr96)	286
10	2	5	IL-10R-alpha	287
10	3	5	IL-10R-alpha (Phospho-Tyr496)	288
10	4	5	IL-4R/CD124	289
10	5	5	IL-4R/CD124 (Phospho-Tyr497)	290
10	6	5	Bax	291
10	7	5	BAX (Phospho-Thr167)	292
10	8	5	PLK1	293
10	9	5	PLK1 (Phospho-Thr210)	294
10	10	5	TGFBR1	295
10	11	5	TGFBR2	296
10	12	5	Fos	297
10	13	5	SREBP-1	298
10	14	5	Caspase 3	299
10	15	5	Beclin-1	300
10	16	5	WNT1	301
10	17	5	VDAC1	302
10	18	5	COX41	303
10	19	5	Beta actin	304
10	20	5	Negative control	N
10	21	5	Negative control	N
10	22	5	Negative control	N
10	23	5	Negative control	N
10	24	5	Empty	E
10	25	5	Empty	E
10	26	5	Empty	E
10	27	5	Empty	E
10	28	5	Empty	E
10	29	5	Empty	E
10	30	5	Empty	E
10	31	5	Empty	E
10	32	5	Position Marker	P
10	1	6	BLNK (Phospho-Tyr96)	286
10	2	6	IL-10R-alpha	287
10	3	6	IL-10R-alpha (Phospho-Tyr496)	288
10	4	6	IL-4R/CD124	289
10	5	6	IL-4R/CD124 (Phospho-Tyr497)	290
10	6	6	Bax	291
10	7	6	BAX (Phospho-Thr167)	292
10	8	6	PLK1	293
10	9	6	PLK1 (Phospho-Thr210)	294
10	10	6	TGFBR1	295
10	11	6	TGFBR2	296
10	12	6	Fos	297
10	13	6	SREBP-1	298
10	14	6	Caspase 3	299
10	15	6	Beclin-1	300
10	16	6	WNT1	301
10	17	6	VDAC1	302
10	18	6	COX41	303
10	19	6	Beta actin	304
10	20	6	Negative control	N
10	21	6	Negative control	N
10	22	6	Negative control	N
10	23	6	Negative control	N
10	24	6	Empty	E
10	25	6	Empty	E
10	26	6	Empty	E
10	27	6	Empty	E
10	28	6	Empty	E
10	29	6	Empty	E
10	30	6	Empty	E
10	31	6	Empty	E
10	32	6	Position Marker	P
